## Abstract

Phenotypic variation across related individuals is often correlated: a high or low value of one phenotype tends to be associated with a high or low value of others. This may reflect lower-dimensional structure in the genotype-phenotype map, such that genotype affects a relatively small set of unobserved “core” processes that in turn determine the observed phenotypes. Identifying low-dimensional structure in high-dimensional genotype-phenotype data thus offers the promise of inferring the identity and genetic basis of core biological processes, as well as the way in which core processes determine each observed phenotype. However, inferring this lower-dimensional structure requires appropriate biologically motivated constraints, even with high-throughput genotype-phenotype measurements. Here, we show that several recent empirical genotype-phenotype data sets exhibit evidence of sparse structure, and that a sparsity-favoring matrix decomposition approach can accurately recover latent processes if each genetic perturbation affects few core processes or if each phenotype is affected by few core processes. Motivated by this, we develop a generally applicable framework based on penalized matrix decomposition for *sparse structure discovery* (SSD) and apply it to three empirical datasets spanning adaptive mutations in yeast, genotoxin robustness assay in human cell lines, and genetic loci identified from a yeast cross. More generally, we propose sparsity as a guiding prior for resolving latent structure in empirical genotype-phenotype maps.

## 14 I. INTRODUCTION

15 A central goal of quantitative genetics is to exploit observed correlations between genotype  
16 and phenotype to infer the structure of the genotype-phenotype map [1–6]. That is, we aim  
17 to build models describing how variation in genotype influences variation in phenotype.  
18 However, the choice of phenotypes quantitative geneticists choose to analyze is inherently  
19 subjective: we typically focus on phenotypes that are practical to measure and/or that  
20 are in some sense “important” (e.g. because they are plausibly related to key functions  
21 or diseases). These phenotypes are often correlated, presumably because multiple complex  
22 traits are often influenced by the same set of core cellular processes. For example, cellular

---

\* These two authors contributed equally

† [desai@oeb.harvard.edu](mailto:desai@oeb.harvard.edu)

23 growth rates across a range of different stressful conditions may be determined by a common  
24 set of processes such as metabolism, cell wall biosynthesis, DNA repair, and heat or osmotic  
25 stress response. This leads to apparent widespread pleiotropy, where individual genetic loci  
26 influence many observed phenotypes, presumably because these loci influence one or more  
27 core processes that are broadly important across multiple phenotypes.

28 This perspective suggests that the structure of the correlations between the subjective  
29 phenotypes that we choose to measure should contain signatures of the underlying biolog-  
30 ically relevant core processes. That is, if we could measure a large and diverse enough  
31 set of phenotypes across a sufficiently diverse range of genotypes, the observed phenotypic  
32 variation should have a lower-dimensional latent structure that reflects the space of actual  
33 core processes. Inferring this lower-dimensional latent structure thus offers the promise  
34 of explaining the biological basis of pleiotropy, by identifying the core biological processes  
35 and inferring how individual loci influence these core processes to generate the observed  
36 phenotypic variation.

37 Of course, we can only hope to identify core processes which generate variation across  
38 the phenotypes we choose to measure, so the core processes we infer will always be limited  
39 by this choice. For example, imagine that we measure a set of phenotypes that correspond  
40 to the growth rates of yeast cells across a temperature gradient. We might expect that  
41 these phenotypes exhibit a correlation structure that reflects three core processes: heat  
42 shock response, cold tolerance, and all other temperature-independent factors relevant to  
43 the common growth medium. We could then hope to infer the extent to which each genetic  
44 locus influences each of the core processes, as well as the mapping between these three core  
45 processes and the observed phenotypes. However, if we were to measure additional pheno-  
46 types corresponding to growth rates across (for example) different nutrient concentrations,  
47 we might find that this splits the temperature-independent core process into additional  
48 processes that explain the variation in the new phenotypes.

49 In this manuscript, we introduce a method for inferring this lower-dimensional latent  
50 structure of phenotype space. We assume that we have data that describes the map between  
51 genotype and some set of measured phenotypes. In general, this genotype-phenotype map  
52 can involve nonlinear effects such as interactions between multiple genetic loci (epistasis).  
53 However, we focus here on analyzing a standard linear approximation of this map, in which  
54 each locus is assumed to have an additive effect on each of the phenotypes, and the observed

55 phenotype is simply a sum of the additive effects of all the relevant loci. This linear map  
56 can be represented as an  $E \times L$  matrix,  $\mathbf{F}$ , which has columns corresponding to each of the  
57  $L$  loci and rows corresponding to the effect of these loci on the  $E$  measured phenotypes.  
58 We note that inferring  $\mathbf{F}$  from data on genotypes and corresponding phenotypes can be a  
59 complex problem, which we address for one example data set below, but the core of our  
60 analysis in this paper assumes that  $\mathbf{F}$  is given and focuses on analyzing the latent structure  
61 in this matrix.

62 In this framework, our problem reduces to inferring lower-dimensional structure in the  
63 matrix  $\mathbf{F}$ . While in principle this structure could be nonlinear, we restrict ourselves to  
64 inferring a lower-dimensional subspace that can be expressed as a matrix decomposition of  
65  $\mathbf{F}$ . Specifically, we wish to approximate  $\mathbf{F}$  as the product of two matrices,  $\mathbf{F} \approx \mathbf{W}\mathbf{M} + \mathbf{b}$ ,  
66 where  $\mathbf{M}$  is a  $K \times L$  matrix that describes the additive effect of each genetic locus on each of  
67  $K$  putative core processes, and  $\mathbf{W}$  is an  $E \times K$  matrix that describes how each core process  
68 affects each measured phenotype. In addition, we include a term  $\mathbf{b}$  which represents locus-  
69 specific effects on all other processes that contribute equally to the phenotypes measured  
70 (and hence cannot be disentangled). For  $K < E, L$ , this represents an approximation to  $\mathbf{F}$   
71 in terms of a lower-dimensional subspace of  $K$  core processes. This structure is illustrated  
72 in Figure 1a. We emphasize that this decomposition assumes that the map between loci  
73 and core processes and the map between core processes and measured phenotypes are both  
74 linear, which may not be true in general. We return to this caveat in the Discussion.

75 Unfortunately, this matrix decomposition problem is underdetermined in general, mean-  
76 ing that for any choice of  $K$  there are many different pairs of matrices  $\mathbf{W}$  and  $\mathbf{M}$  that  
77 approximate  $\mathbf{F}$  equally well. Thus, the fact that a given decomposition gives a good approx-  
78 imation for  $\mathbf{F}$  does not necessarily imply that there is any biological meaning to the core  
79 processes inferred. This problem is widely recognized in a variety of fields where this type of  
80 matrix decomposition is used to infer lower-dimensional structure in high-dimensional data.  
81 To make lower-dimensional structure interpretable, domain-specific knowledge must there-  
82 fore be used to guide the choice of additional constraints. For example, earlier work has used  
83 sparsity [7, 8], non-negativity [9–11] and non-Gaussianity assumptions [12–14] to construct  
84 powerful methods for identifying meaningful latent structure in specific contexts where those  
85 constraints are appropriate. The success of these approaches motivates our attempt here  
86 to find appropriate constraints that enable the efficient and interpretable reconstruction of

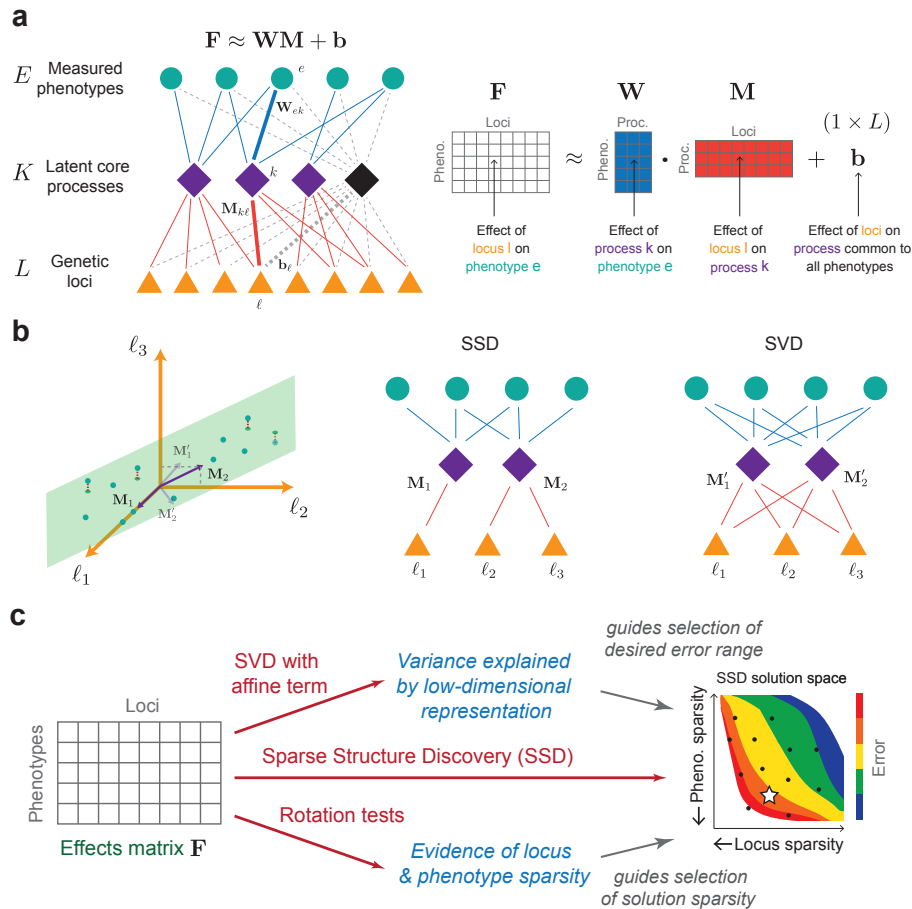

**FIG. 1: Overview and geometric interpretation of SSD.** (a) Sparse structure discovery (SSD) finds a sparse, low-rank approximation for the effects matrix  $F$  containing the phenotypic effects of  $L$  loci on  $E$  phenotypes. (b) Each phenotype (row of  $F$ ) can be viewed as a point in locus-space. The core processes (rows of  $M$ ) can be viewed as vectors that span a lower dimensional subspace, illustrated by the plane. The distances between each phenotype point and the subspace determine the reconstruction error (illustrated by dotted red lines). Since the error is a function of the subspace and there are many matrices  $M$  which generate the same subspace, many decompositions yield the same error. SSD applied to these phenotypes would favor a sparse decomposition, for example, the core processes  $M_1, M_2$  which here are sparse combinations of  $(l_1), (l_2, l_3)$  respectively. SVD applied to the same phenotypes would yield a decomposition with core processes  $M'_1, M'_2$  that incur the least error but which are unlikely to be sparse. (c) In our analysis pipeline, we first apply SSD to find a range of decompositions  $F \approx WM + b$  with varying errors and sparsities. The reconstruction error of the SVD solution is used to determine a tolerable error range for SSD solutions. The rotation tests are used to guide the selection of an SSD solution with appropriate levels of sparsity in phenotypes (each phenotype is described by few core processes) and in the loci (each locus is part of few core processes).

87 a lower-dimensional set of core processes from empirical genotype-phenotype maps. Such  
 88 constraints can be thought of as incorporating a biological “prior” on the features we expect  
 89 the data to exhibit.

90 Recently, Kinsler et. al. [15] identified lower-dimensional structure in a dataset describing  
91 the effects of a set of yeast mutations on fitness in different environments. Their approach  
92 used Singular Value Decomposition (SVD) [16] to find a decomposition with  $K < E, L$   
93 that approximates the  $\mathbf{F}$  well. However, while SVD finds the  $K$ -dimensional subspace that  
94 explains the most variation for a given  $K$ , the specific  $\mathbf{W}$  and  $\mathbf{M}$  are selected subject to the  
95 constraints that the core processes must be orthogonal and that the first  $j$  core processes  
96 describe the  $j$ -dimensional subspace that best approximates  $\mathbf{F}$ . It is not clear that these  
97 constraints lead to putative core processes with biological meaning. More recently, Pan et.  
98 al. [17] introduced an alternative matrix decomposition method, Webster, which is based on  
99 regularized dictionary learning [18], and apply it to a dataset describing the fitness of cells  
100 exhibiting gene-knockouts in the presence of various genotoxins [19]. This method enforces  
101 a hard constraint that each genetic locus affects at most two core processes, which limits  
102 the possibility that different loci exhibit different degrees of pleiotropy.

103 Here, we introduce a new approach that constrains the decomposition based on biologi-  
104 cally motivated intuition about the lower-dimensional structure of the genotype-phenotype  
105 map. Specifically, our *Sparse Structure Discovery* (SSD) method encourages decomposi-  
106 tions where each genetic locus affects a small subset of the core processes (locus-sparsity)  
107 and/or each observed phenotype is influenced by a small subset of core processes (phenotype-  
108 sparsity) (Figure 1). These sparsity assumptions are consistent with various notions of mod-  
109 ularity which have been proposed to explain the evolvability of complex traits [1, 20–24],  
110 and with large-scale studies of pairwise gene deletions in yeast, which find that genes cluster  
111 together based on their interaction profiles, suggesting their involvement in a small set of  
112 common core processes [25]. However, we do not adopt either sparsity assumption uncriti-  
113 cally. Instead, we have developed two empirical tests to independently validate the extent  
114 to which the lower-dimensional structure in an effects matrix  $\mathbf{F}$  exhibits locus-sparsity or  
115 phenotype-sparsity. Using these tests, we find evidence of locus-sparsity and phenotype-  
116 sparsity across three datasets, motivating the use of these sparsity-enforcing penalties in our  
117 SSD method. Further, we show that SSD accurately recovers synthetically-generated maps  
118 if at least one of the true  $\mathbf{W}$  or  $\mathbf{M}$  is sparse.

119 The structure of the paper is as follows. In Section II, we describe the SSD method,  
120 explain our empirical tests for sparsity, and demonstrate that SSD accurately recovers core  
121 processes in synthetic data. In Section III, we apply our method to three datasets that

122 measure cellular fitness across environments as a function of three different forms of genetic  
123 variability. First, we apply SSD to the Kinsler et. al. dataset [15] describing fitness effects of  
124 adaptive mutations identified during a laboratory yeast evolution experiment and compare  
125 SSD to the SVD-based analysis presented in [15]. Second, we apply SSD to data describing  
126 how single gene knockouts in human cell lines affect fitness in the presence of genotoxic  
127 agents [19]. We find that, compared to the Webster analysis of the same dataset [17], SSD  
128 solutions exhibit lower error with comparable average sparsity, a more interpretable process-  
129 phenotypes map, and a broad range of pleiotropy across loci. Third, we analyze a large-  
130 scale quantitative trait locus (QTL) mapping experiment [26], which measured 18 growth  
131 rate phenotypes in about 100,000 F1 offspring of a cross between two related budding yeast  
132 strains. For this data, we first develop a joint mapping approach to arrive at an additive  
133 effects matrix  $\mathbf{F}$ , which we do using a pipeline based on  $\ell_{2,1}$ -penalized regression (see SI).

## 134 II. SPARSE STRUCTURE DISCOVERY

135 As described above, our method assumes we begin with an empirical linear genotype-  
136 phenotype map, represented as an  $E \times L$  matrix  $\mathbf{F}$  which describes the additive effect of  
137 each of the  $L$  genetic loci on each of the  $E$  measured phenotypes. Our goal is to find latent  
138 structure in this genotype-phenotype map of the form  $\mathbf{F} \approx \mathbf{W}\mathbf{M} + \mathbf{b}$ . Note that since we  
139 will generally assume that  $K < E, L$ , the matrices  $\mathbf{W}$  and  $\mathbf{M}$  contain fewer total parameters  
140 than  $\mathbf{F}$  (i.e. this is a simpler description of the data). Thus, this factorization will in general  
141 only be an approximation, both because there is presumably error in the estimation of  $\mathbf{F}$  and  
142 because the division into  $K$  core processes is a simplifying assumption that will inevitably  
143 neglect some aspects of the full complexity underlying each measured phenotype.

144 Given that the factorization of  $\mathbf{F}$  is approximate, a natural goal would be to find matrices  
145  $\mathbf{W}$  and  $\mathbf{M}$  that minimize the error in this approximation. This is the motivation underlying  
146 singular value decomposition (SVD), which finds a factorization of  $\mathbf{F}$  that minimizes the  
147 squared Frobenius reconstruction error (i.e. lowest squared error  $\|\mathbf{F} - \mathbf{W}\mathbf{M}\|_2^2$ ). However,  
148 this error minimization alone is not sufficient to uniquely determine the factorization. In-  
149 stead, any factorization that describes the same lower-dimensional subspace will perform  
150 equally well, as illustrated in Figure 1b. This is a general problem: for any set of core  
151 processes, represented by the rows of  $\mathbf{M}$ , that achieve a given reconstruction error, there are

152 infinitely many sets of other processes that achieve the same error (obtained by changing  
153 the basis of the subspace, e.g. by rotating the rows of  $\mathbf{M}$  in the subspace they generate).  
154 SVD chooses a particular unique solution to resolve this degeneracy by defining the first core  
155 process to be the one-dimensional subspace that minimizes the error for  $K = 1$ , the second  
156 core process to be orthogonal to the first and minimize the error for  $K = 2$ , the third to be  
157 orthogonal to the first two and minimize the error for  $K = 3$ , and so on. While this is a  
158 reasonable and well-defined procedure, there is no reason to believe that the core processes  
159 defined in this way will be biologically meaningful.

160 Here we define an alternative method for matrix decomposition. Like SVD, our approach  
161 attempts to minimize the Frobenius reconstruction error. However, we add two additional  
162 constraints based on *sparsity*. Specifically, we aim to find a locus to core process map  $\mathbf{M}$  in  
163 which each locus participates in only a few processes (i.e. most entries in this matrix are 0).  
164 We refer to this as locus-sparsity. Analogously, we aim to find a core process to phenotype  
165 map  $\mathbf{W}$  in which each phenotype is affected by only a few core processes (i.e. most entries  
166 in this matrix are also 0). We refer to this as phenotype-sparsity.

We do not necessarily assume that both types of sparsity exist in a given dataset. Instead,  
our framework allows us to impose constraints on either or both types with a tunable stringency  
(and below we describe how the choice of this stringency can be guided by empirical  
validation tests). To be precise, our *Sparse Structure Discovery* (SSD) method aims to find  
the matrix decomposition  $\mathbf{F} \approx \mathbf{W}\mathbf{M} + \mathbf{b}$  that minimizes

$$\mathcal{C}(\mathbf{W}, \mathbf{M}, \mathbf{b}) = \|\mathbf{F} - (\mathbf{W}\mathbf{M} + \mathbf{b})\|_2^2 + \lambda_W \|\mathbf{W}\|_1 + \lambda_M \|\mathbf{M}\|_1 \quad (1)$$

such that  $\|\mathbf{M}_{k,:}\|_2 = 1$  for all  $1 \leq k \leq K_{\max}$ ,

167 where  $\|\mathbf{F} - (\mathbf{W}\mathbf{M} + \mathbf{b})\|_2^2$  is the squared Frobenius error,  $\|\mathbf{W}\|_1$  is an  $\ell_1$ -norm measure  
168 of the phenotype-sparsity, and  $\|\mathbf{M}\|_1$  is an  $\ell_1$ -norm measure of the locus-sparsity. The  
169 parameters  $\lambda_W$  and  $\lambda_M$  determine the relative weighting of the accuracy, phenotype-sparsity,  
170 and locus-sparsity objectives (higher  $\lambda_W$  will yield solutions that are more phenotype-sparse,  
171 and higher  $\lambda_M$  will yield solutions that are more locus-sparse). We note that when these  
172 regularization parameters  $\lambda_W$  and  $\lambda_M$  are sufficiently large, the method will assign no loci  
173 to some of the core processes, thereby automatically picking a number of core processes  $K$   
174 smaller than the input upper bound  $K_{\max}$ .



175 For fixed values  $\lambda_W$ ,  $\lambda_M$ , and  $K_{\max}$ , SSD will yield a unique set of  $\mathbf{W}$ ,  $\mathbf{M}$  and  $\mathbf{b}$ . However,  
176 a key challenge is to choose values of these parameters to determine an appropriate weight-  
177 ing of the accuracy, phenotype-sparsity, and locus-sparsity objectives that will produce a  
178 decomposition with plausible biological meaning. To do so, we first apply our method for a  
179 range of values  $\lambda_W$  and  $\lambda_M$  to produce a variety of decompositions that vary in reconstruc-  
180 tion error, number of core processes, locus-sparsity, and phenotype-sparsity. In every case,  
181 the SSD decomposition will have higher reconstruction error than the SVD decomposition  
182 with the same number of processes because of the additional constraints. We therefore use  
183 the SVD error as a guide to select a desired reconstruction error range, and select sparse  
184 decompositions of interest that fall within this range. The choice between these can then  
185 be guided by the empirical test described below, which we developed to determine the ex-  
186 tent to which an input matrix  $\mathbf{F}$  exhibits a low-dimensional structure with locus-sparsity or  
187 phenotype-sparsity. Figure 1c illustrates the pipeline.

#### 188 **A. Empirical validation of sparsity constraints using rotation tests**

189 To validate our choice of sparsity assumptions, we designed heuristic tests to determine  
190 whether a given dataset  $\mathbf{F}$  exhibits signatures of locus-sparsity or phenotype-sparsity. We  
191 do not assume that the linear term  $\mathbf{b}$ , which describes the effects of loci on processes that  
192 do not vary across the phenotypes, is necessarily sparse. For the purposes of this test,  
193 we therefore first subtract the mean effect across phenotypes for each locus from  $\mathbf{F}$ , as an  
194 approximation of  $\mathbf{b}$ . To test for locus-sparsity, we then apply a random orthogonal matrix  
195  $\mathbf{O}$  to the empirical genotype-phenotype map  $\mathbf{F}$  to produce a matrix  $\mathbf{F}' = \mathbf{FO}$ . This rotation  
196 conserves low-dimensional structure in  $\mathbf{F}$  and leads to the same SVD error but disrupts  
197 any potential locus-sparsity. We then apply our SSD method with a range of weights on  
198 the locus-sparsity objective to obtain a range of decompositions for  $\mathbf{F}$  and  $\mathbf{F}'$  that exhibit  
199 varying locus-sparities and reconstruction errors. If the input matrix  $\mathbf{F}$  truly has locus-  
200 sparsity, our method will consistently find sparser solutions for  $\mathbf{F}$  than for  $\mathbf{F}'$  across a range  
201 of reconstruction errors. If so, we consider this to be evidence of locus-sparsity in  $\mathbf{F}$ .

202 To gain intuition for this test, consider an example with five loci and two core processes,  
203 with loci  $\ell_1$  and  $\ell_2$  both affecting core process 1 (with equal weight) and loci  $\ell_3, \ell_4$  and  $\ell_5$  all  
204 affecting core process 2 (also with equal weight). The rows of the matrix  $\mathbf{F}$  will each have

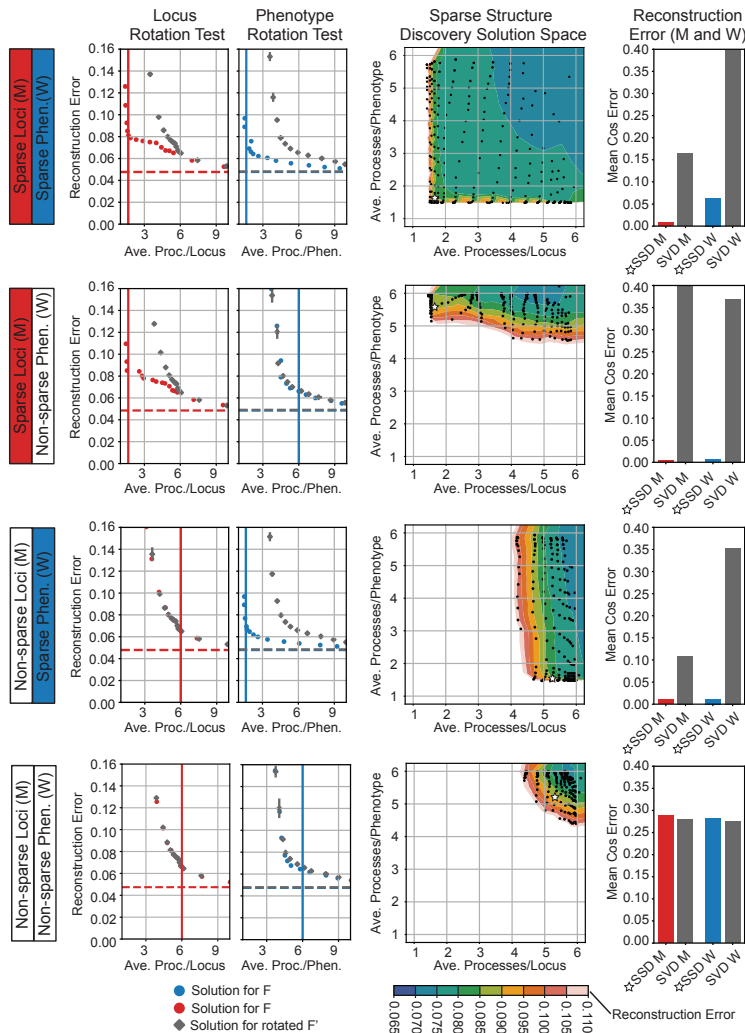

FIG. 2: **SSD on synthetic data.** Each row corresponds to a synthetic additive effects matrix  $F = \mathbf{W}\mathbf{M} + \eta$  generated with different sparsities in  $\mathbf{M}$  and  $\mathbf{W}$ . All examples have  $E = 96$  phenotypes,  $L = 200$  loci and  $K = 6$  true core processes. First column: Locus (phenotype) rotation test illustrates that when  $\mathbf{F}$  is generated with sparsity in  $\mathbf{M}$  ( $\mathbf{W}$ ), there is a gap between the sparsity of the SSD solutions for  $\mathbf{F}$  in blue (red) and rotated  $\mathbf{F}' = \mathbf{F}\mathbf{O}$  ( $\mathbf{F}' = \mathbf{O}\mathbf{F}$ ) in grey. Error bars are over three random rotations. The red and blue horizontal dashed lines indicate the 6-component SVD reconstruction error. The grey dashed line indicates the average 6-component SVD reconstruction error of  $\mathbf{O}\mathbf{F}$ . Note that the SVD error for  $\mathbf{F}\mathbf{O}$  is equal to that for  $\mathbf{F}$ . The vertical red (blue) line indicates the average processes per locus (phenotype) for the true  $\mathbf{M}$  ( $\mathbf{W}$ ). Second column: Each scatter point depicts the average mean processes per locus/phenotype of an SSD solution. The colored background illustrates the interpolated reconstruction errors of the solutions. The solutions selected for further investigation are marked by a star. Third column: The mean cosine error between each row of the inferred  $\mathbf{M}$  (column of inferred  $\mathbf{W}$ ) for the selected SSD solution and for the 6-component SVD solution and the true  $\mathbf{M}$  ( $\mathbf{W}$ ). The error in  $\mathbf{W}$  in the first row is almost exclusively due to 4 phenotypes that use no processes, but are assigned very small weights in some processes by SSD.

205 the form  $(\alpha, \alpha, \beta, \beta, \beta)$ , where  $\alpha$  and  $\beta$  describe the effect of the first and second processes  
 206 on the phenotype corresponding to that row, respectively. In other words, the phenotype

207 values lie on a 2D plane in 5D space. This plane contains the sparse vectors  $(1, 1, 0, 0, 0)$   
208 and  $(0, 0, 1, 1, 1)$ , which describe the two core processes, and every point on the plane can  
209 be written as a weighted sum of these vectors. Now, imagine that we randomly rotate  $\mathbf{F}$ ,  
210 producing a matrix  $\mathbf{F}'$  which has rows that lie on a rotation of the 2D plane containing the  
211 rows of  $\mathbf{F}$  and columns that correspond to random linear combinations of the actual genetic  
212 loci. Since the rotation was random, the 2D plane containing the rows of  $\mathbf{F}'$  is a random 2D  
213 plane in 5D. Most 2D planes in 5D are not spanned by two sparse basis vectors. Therefore,  
214 while it is still possible to find two vectors such that each row of  $\mathbf{F}'$  can be written as the  
215 weighted sum of these vectors (the low-dimensional structure is preserved), the two vectors  
216 almost certainly will not be sparse.

217 To test for phenotype-sparsity, we use an analogous method, except that we rotate the  
218 columns of  $\mathbf{F}$  to obtain  $\mathbf{F}' = \mathbf{O}\mathbf{F}$  and vary the phenotype-sparsity objective in SSD to test  
219 whether SSD consistently finds sparser solutions for  $\mathbf{F}$  than  $\mathbf{F}'$  across a range of reconstruc-  
220 tion errors.

## 221 **B. Sparse structure recovery on synthetic data**

222 To validate our method, we constructed synthetic genotype-phenotype maps with lower-  
223 dimensional latent structure of varying sparsity. That is, for a given  $E$ ,  $L$ , and  $K$ , we  
224 construct simulated data matrices  $\mathbf{F} = \mathbf{W}\mathbf{M} + \eta$  by randomly choosing  $\mathbf{M}$  and  $\mathbf{W}$  as  
225 described below. The noise  $\eta$  in each element is drawn independently with scale 0.3 times  
226 the standard deviation of the entries in  $\mathbf{W}\mathbf{M}$ . We construct simulated  $\mathbf{F}$  matrices across a  
227 range of sparsities in  $\mathbf{M}$  and  $\mathbf{W}$ . Specifically, for  $\mathbf{M}$ -sparsity  $p$ , entries are non-zero with  
228 probability  $p$ , and if non-zero, the entry is drawn from a standard normal. We then normalize  
229  $\mathbf{M}$  so that each row is a unit vector. We generate  $\mathbf{W}$  analogously with  $\mathbf{W}$ -sparsity  $q$ , but  
230 without normalization.

231 We begin by constructing four sets of simulated data: one with both locus-sparsity and  
232 phenotype-sparsity ( $p = 0.2, q = 0.2$ ), one each with only one type of sparsity ( $p = 0.2, q = 1$   
233 and  $p = 1, q = 0.2$ ), and one with neither ( $p = 1, q = 1$ ). For each set, we first applied the  
234 locus and phenotype rotation tests. The results are presented in the left column of Figure 2.  
235 Note that the presence of the gap between the error curves for  $\mathbf{F}$  and rotated  $\mathbf{F}'$  in the  
236 locus (phenotype) rotation test depends on whether  $\mathbf{M}$  ( $\mathbf{W}$ ) is sparse. Repeating this test

237 across a range of locus and phenotype sparsities, we show that the size of the gap grows  
238 continuously with sparsity (Figure S1).

239 Next, we evaluated whether SSD can accurately reconstruct the true  $\mathbf{M}$  and  $\mathbf{W}$  matrices.  
240 We applied our SSD method to each dataset across a range of locus-sparsity ( $\lambda_M$ ) and  
241 phenotype-sparsity ( $\lambda_W$ ) constraints and selected one decomposition using the SVD error  
242 and rotation tests as guides. The reconstruction error of the SVD decomposition on each  
243 dataset is in the range 0.047–0.049. Keeping in mind that any SSD solution will necessarily  
244 have higher error, we focus on “low-error” decompositions with error up to 0.85, illustrated  
245 by dark green, teal, and blue in the space of SSD decompositions (Figure 2, center column).  
246 We select a low-error decomposition that exhibits the most sparsity for the chosen error  
247 criterion (indicated by a white star in Figure 2).

248 Finally, we compared the  $\mathbf{M}$  and  $\mathbf{W}$  of the selected SSD solutions to the true  $\mathbf{M}$  and  $\mathbf{W}$   
249 matrices using a cosine error metric described in the Methods (third column of Figure 2).  
250 We find that exhibiting sparsity in either  $\mathbf{W}$  or  $\mathbf{M}$  (first three rows) suffices for SSD to  
251 accurately reconstruct both  $\mathbf{W}$  and  $\mathbf{M}$ . Given a non-redundant set of core processes  $\mathbf{M}$ ,  
252 there is a unique set of phenotype weights  $\mathbf{W}$  that best reconstruct  $\mathbf{F}$  (and vice-versa for  
253  $\mathbf{W}$ ). In contrast to SSD, the SVD decompositions are unable to accurately reconstruct  $\mathbf{M}$   
254 and  $\mathbf{W}$ , despite lower reconstruction errors when reconstructing  $\mathbf{F}$ .

255 The phenotypes constructed as described in this section are correlated in so far as each is  
256 a random linear combination of a common set of core processes. However, empirical studies  
257 may measure phenotypes with non-trivial structure, e.g. fitness measurements where the  
258 same environmental perturbations are added to various growth mediums. To validate the  
259 rotation tests and SSD in such a setting, we generated synthetic data with a hub-and-spoke  
260 structure. Specifically, we introduce “hub” phenotypes (representing the growth mediums)  
261 whose effects are a random linear combination of a common set of core processes and “spoke”  
262 phenotypes (each representing a growth medium with a perturbation) whose effects are a  
263 linear combination of the corresponding hub phenotype and one core process representing  
264 the perturbation (Figure S2a). See SI for further details.

265 Next, we apply the rotation tests to the hub-and-spoke synthetic data and find evidence  
266 of both locus-sparsity and phenotype-sparsity (Figure S3). We find that a selected SSD so-  
267 lution exhibiting both types of sparsity accurately recovers the initially described generative  
268 structure. If we instead ignore evidence of locus-sparsity and select an SSD solution that

269 exhibits a greater degree of phenotype-sparsity and little locus-sparsity, the decomposition  
270 resembles an alternate generative structure where each hub phenotype is instead described  
271 by a single core process (Figure S2b). In contrast, SVD finds a solution with lower recon-  
272 struction error but with matrices  $\mathbf{M}$  and  $\mathbf{W}$  that lack any clear relationship to the core  
273 processes that generated the synthetic data.

### 274 III. APPLICATIONS TO EMPIRICAL DATA

#### 275 A. Fitness effects of adaptive mutations in yeast

276 To illustrate the applicability of our framework, we first analyze data from a recent study  
277 by Kinsler *et. al.* [15]. This study attempted to infer a lower-dimensional latent structure of  
278 phenotype space by measuring the fitness effects of a set of specific yeast mutations across  
279 a range of environmental perturbations. Specifically, they isolated 292 yeast strains from  
280 an earlier laboratory evolution experiment, each of which contains one or a few putatively  
281 adaptive mutations. They measured the fitness of each of these strains across a set of  
282 45 environments. Based on these measurements, they divided the 45 environments into  
283 25 “subtle” perturbations (in which fitness effects of mutations vary only slightly) and 20  
284 “strong” perturbations. Applying SVD on the data from the subtle perturbations, they  
285 identified an eight-dimensional subspace that explains most of the variation in the data  
286 across these perturbations. They then showed that this latent structure can also predict the  
287 fitness effects of the mutations across the 20 “strong” perturbations, which they interpret  
288 as evidence that the subtle perturbations reveal a “local” modularity that is able to predict  
289 the global pleiotropic effects of adaptation in this system.

290 We sought to investigate whether our SSD method can recover an alternative sparse  
291 lower-dimensional structure in the Kinsler *et. al.* data. Rather than divide environments  
292 into “subtle” and “strong” perturbations, we took the entire mutational effects matrix repre-  
293 senting 288 strains across 45 environments as our input  $\mathbf{F}$  (we use 288 instead of the original  
294 292 due to a minor difference in a pre-processing step, see SI). We then applied our locus and  
295 phenotype rotation tests (Figure 3b), which confirm that there is strong evidence for spar-  
296 sity in both the process-phenotype map ( $\mathbf{W}$ ) and the locus-process map ( $\mathbf{M}$ ). Note however  
297 that removing most diploids from this data (one key type of mutation that represents 188

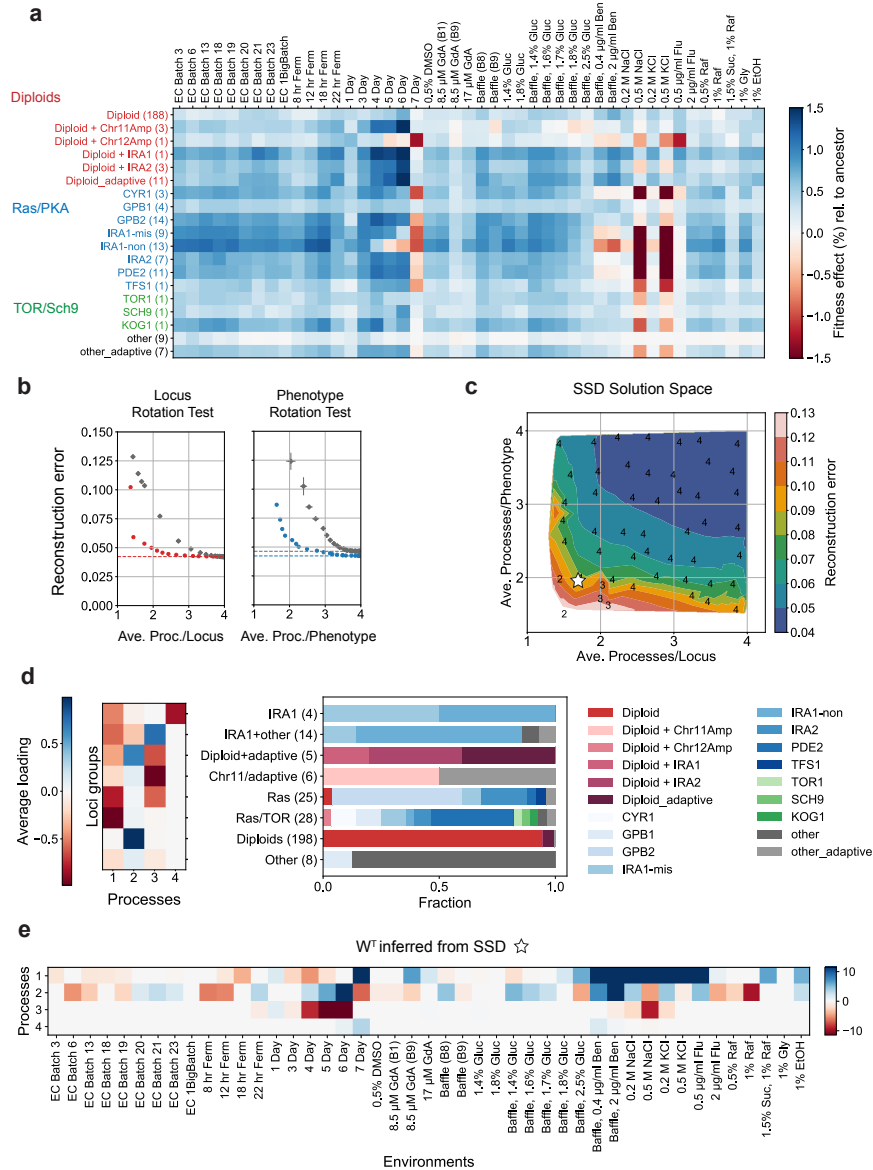

FIG. 3: SSD applied to pleiotropic fitness effects of adaptive mutations in yeast (a) A reduced representation of the effects matrix  $F$  ( $45(E) \times 288(L)$ ) where the effects of mutations with common annotations are grouped together. The number of mutations with each annotation is shown in parenthesis. (b) The locus and phenotype rotation tests show extensive sparsity in both the process-phenotype and locus-process maps. (c) The solution space illustrating highly sparse solutions with low reconstruction error. The chosen solution with 8.5% error is marked with a white star. (d) The  $M$  matrix with loci clustered into 8 groups based on linkage clustering of loci with a modified cosine similarity metric (see Methods). On the right, the fraction of loci types in each of the 8 groups is shown. The number of loci in each group is shown in parenthesis next to its label. (e) The process-phenotype map  $W$ .

298 of the 288 mutations studied) eliminates sparsity in  $M$  but not in  $W$  (Figure S4). Further  
 299 analysis (discussed below) finds that the diploids predominantly affect one core process and  
 300 thus the locus-sparsity indicated by the rotation test can be explained by the large number

301 of diploids in the data. This is not an issue for applying SSD, as SSD requires sparsity in  
302 only one of  $\mathbf{W}$  and  $\mathbf{M}$ .

303 We find that SSD can identify a sparse, 4-dimensional approximation of  $\mathbf{F}$  that incurs  
304 less than 8% error in reconstructing the original  $\mathbf{F}$  (Figure 3c). For concreteness, we focus  
305 here on the sparse solution indicated by the white star in Figure 3c, which has four core  
306 processes and an average sparsity of about 1.5 processes per locus and 2 processes per  
307 environment. In Figure S5, we highlight the differences between the SVD and SSD solutions.  
308 By construction, the SSD solution has a higher reconstruction error than the corresponding  
309 SVD solution (7.5% error for the sparse SSD solution, compared to 4% error for the 4-  
310 dimensional SVD solution). We find that the SVD solution on a training set also shows lower  
311 error in predicting the fitness effects in held-out environments (the 20 strong perturbations  
312 or a random subset of 9 environments) compared to the SSD solutions of equal rank (Figure  
313 S5). This suggests that SVD tends to find a better low-rank approximation, even when it  
314 fails to find meaningful (and potentially sparse) basis vectors (see Discussion). To highlight  
315 this point, if SVD finds the locus-process and process-phenotype maps  $\mathbf{M}_{\text{SVD}}$ ,  $\mathbf{W}_{\text{SVD}}$  on the  
316 training set, it can be mathematically shown that the maps  $\mathbf{M}' = \mathbf{O}\mathbf{M}_{\text{SVD}}$ ,  $\mathbf{W}' = \mathbf{W}_{\text{SVD}}\mathbf{O}^T$   
317 for any arbitrary orthogonal matrix  $\mathbf{O}$  will match SVD's generalization error. In contrast,  
318 the SSD solution is significantly sparser than the SVD solution (Figure S5) at the expense  
319 of a larger generalization error. Thus, even though SVD by construction finds the subspace  
320 with the lowest reconstruction error, the SSD approach more accurately identifies basis  
321 vectors that capture the sparsity in the genotype-phenotype map indicated by the rotation  
322 tests.

323 To examine if loci with similar effects on core processes identified by SSD align with  
324 existing annotations, we further clustered loci into eight groups by comparing the columns  
325 of the  $\mathbf{M}$  matrix with a modified cosine metric (Methods). We observe that core process  
326 1 is enriched for mutations in genes involved in the Ras and TOR pathways (Figure 3d).  
327 Missense and nonsense mutations in IRA1 (also involved in the Ras pathway) clustered in  
328 the "IRA1+other" group have additional pleiotropic effects on core process 3, which has  
329 a large influence on fitness in environments with an extended stationary phase (4,5 and 6  
330 Day environments in Figure 3e). Diploids are primarily enriched in core process 2, which  
331 has broad pleiotropic effects across environments. Diploids with additional mutations in  
332 IRA1/2 (clustered in the "Diploid + adaptive" group) exhibit effects that combine the

333 effects shown independently by IRA1/2 in the Ras cluster and the Diploids cluster. Thus,  
334 the core processes identified by SSD do appear to have some correspondence with our prior  
335 expectations. To ensure that the many diploids do not significantly bias our results, we  
336 repeated this analysis on a reduced dataset which excludes a random subset of 168 of the  
337 188 diploids, finding similar features in the **W** and **M** maps despite lower average sparsity  
338 in **M** (Figure S4).

339 Finally, it is easier to read off hypotheses from a sparse SSD decomposition than from  
340 a dense SVD decomposition (Figure S5b). For example, since SSD core process 3 almost  
341 exclusively impacts environments with an extended stationary phase (4,5 and 6 Day), it is  
342 reasonable to hypothesize that loci involved in this core process influence a pathway relevant  
343 in stationary phase. In contrast, each SVD core process affects most environments (Figure  
344 S5c), thereby confounding an analogous interpretation. The SSD solution further suggests  
345 that diploidy primarily contributes to core process 2, and the contribution of this process  
346 across environments is a succinct summary of its effect. For the SVD solution, the diploids  
347 do not form a single cluster (Figure S5c,d), and no such summary is apparent.

## 348 **B. Robustness of gene knockouts to genotoxins in human cell lines**

349 Next, we apply our SSD method to the genotoxic fitness screen collected in [19] and  
350 curated in [17] (Figure 4a). This dataset was constructed by performing CRISPR-Cas9  
351 knockouts on an immortalized human cell line (RPE1-hTERT) and subjecting each knockout  
352 variant to 31 genotoxic stressors. We show that the core processes described by our SSD  
353 decomposition are enriched for particular gene annotations and compare our decomposition  
354 to one identified by Webster [17].

355 Our rotation tests find evidence of both locus and phenotype sparsity in this genotoxin  
356 data (Figure 4b). Phenotype-sparsity is not assumed by Webster [17], suggesting that SSD  
357 may lead to a more interpretable process-phenotype map. In order to compare directly to the  
358 Webster decomposition analyzed in [17], we restrict our attention to SSD solutions that have  
359 the same number of core processes ( $K = 10$ ). Guided by the results of the rotation tests, we  
360 select a solution that is sparse in both loci and phenotypes (3.3 average-processes-per-locus,  
361 2.5 average-processes-per-genotoxin), indicated by the white star in Figure 4c.

362 First, we evaluate whether the core processes described by our solution are enriched for



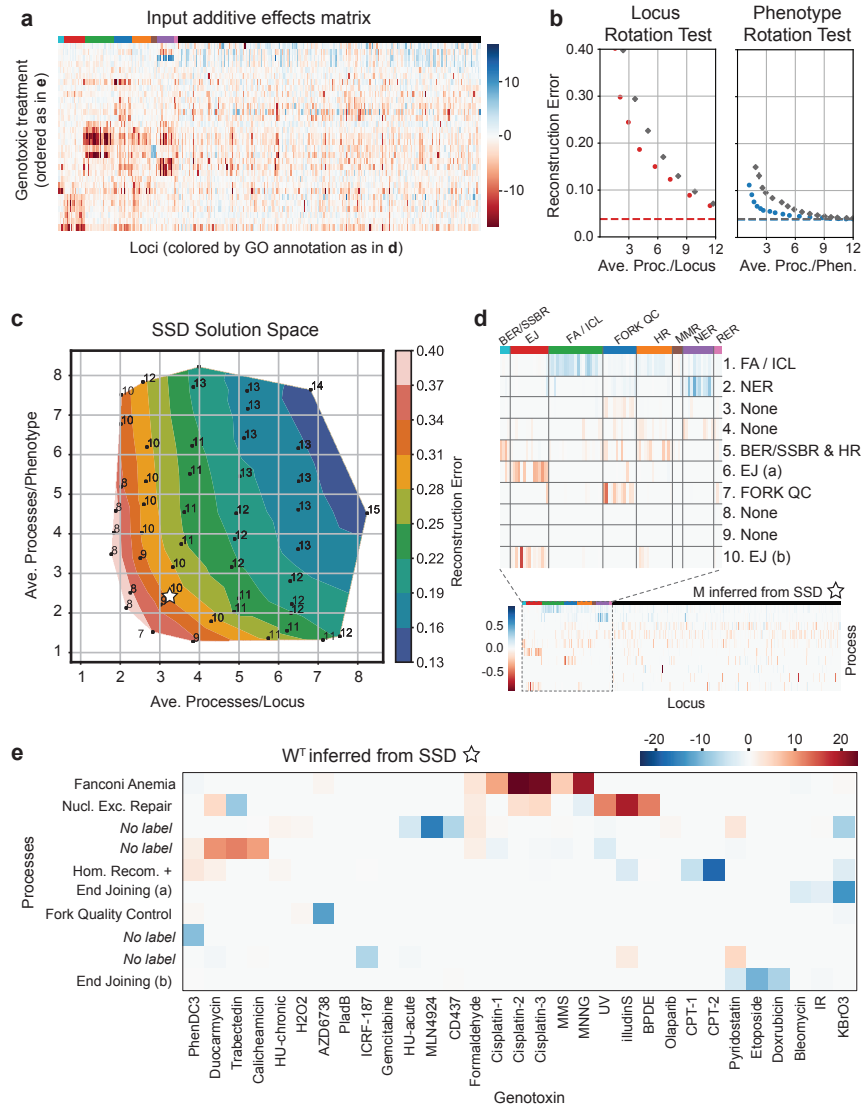

**FIG. 4: SSD applied to dataset of human cell responses to gene knockouts under genotoxic stressors.** (a) The input additive effects matrix  $\mathbf{F}$  generated by [19] and curated by [17]. (b) The locus and phenotype rotation test indicate there is both locus and phenotype sparsity. (c) The space of solutions found by SSD. The white star indicates the solution that we illustrate in (d) and (e). (d) Sorting the loci by GO annotation in the locus-process map  $\mathbf{M}$  reveals that certain processes are enriched for particular annotated functions. (e) The process-phenotype map  $\mathbf{W}$  demonstrates that the response to each genotoxin can be explained by a small number of core processes.

363 loci with particular functional effects. We organize the locus-process map  $\mathbf{M}$  by the loci  
 364 annotations compiled in [19] and observe that core processes 1, 2, and 7 are enriched for  
 365 loci involved with the the repair of interstrand cross-links (ICLs) by Fanconi Anemia (FA)  
 366 proteins, nucleotide excision repair (NER), and DNA replication fork quality control (FORK  
 367 QC) respectively (Fig 4d). Loci involved with end joining are primarily split between core

368 processes 6 and 10. Finally, core process 5 is enriched for loci involved with base excision  
369 repair (BER) and single-strand break repair (SSBR) as well as homologous recombination  
370 (HR). The functional meaning of the other four processes are not immediately clear from  
371 the annotations so we leave them unlabeled; investigating the loci with the strongest effects  
372 could elucidate their meaning, as was done by Pan *et. al.* [17]. Figure 4e illustrates the  
373 process-genotoxin map  $\mathbf{W}$ ; the sparsity indicates that a small number of core processes  
374 explain the effect of each genotoxic stressor.

375 In the SI, we further describe the differences between Webster and SSD and compare the  
376 decompositions of this dataset found by each method. Our SSD method more accurately  
377 reconstructs the additive effects matrix while exhibiting more phenotype-sparsity and  
378 only slightly less locus-sparsity. Moreover, our SSD decomposition exhibits variation in the  
379 degree of pleiotropy across loci, measured by the number of processes each locus participates  
380 in (Figure S6).

### 381 **C. The genotype-phenotype map of a yeast cross**

382 Next, we analyze data from a recent study [26] analyzing genotypes and phenotypes of  
383  $N \approx 100,000$  F1 haploid yeast offspring (segregants) of a cross between RM (a European  
384 wine strain) and BY (a standard lab strain). These two parental strains differ by  $S \approx 42,000$   
385 single-nucleotide-polymorphisms (SNPs), leading to a highly diverse set of genotypes in the  
386 segregant pool. This earlier work measured the fitness (growth rate relative to the parental  
387 BY strain) of each of the segregants in  $E = 18$  environments using a bulk barcode-based  
388 phenotyping assay.

389 The base condition for most of these environments is propagation in batch culture with  
390 1:128 dilutions every 24 hours in rich laboratory media (YPD) at optimal temperature  
391 (30C). We refer to this as the 30°C environment. Other environments are then constructed  
392 by adding stressors to this base condition (e.g. lithium, 4-nitroquinoline oxide, ethanol),  
393 by varying the temperature (23°C to 37°C), by using defined media with various carbon  
394 sources (glucose, mannose, raffinose) instead of YPD, and by using complex natural media  
395 (molasses).

396 To apply SSD to this data, we must first infer the genotype-phenotype map for each  
397 of these 18 environments (i.e. we must infer  $\mathbf{F}$ ). This is a complex problem; Ba *et. al.*

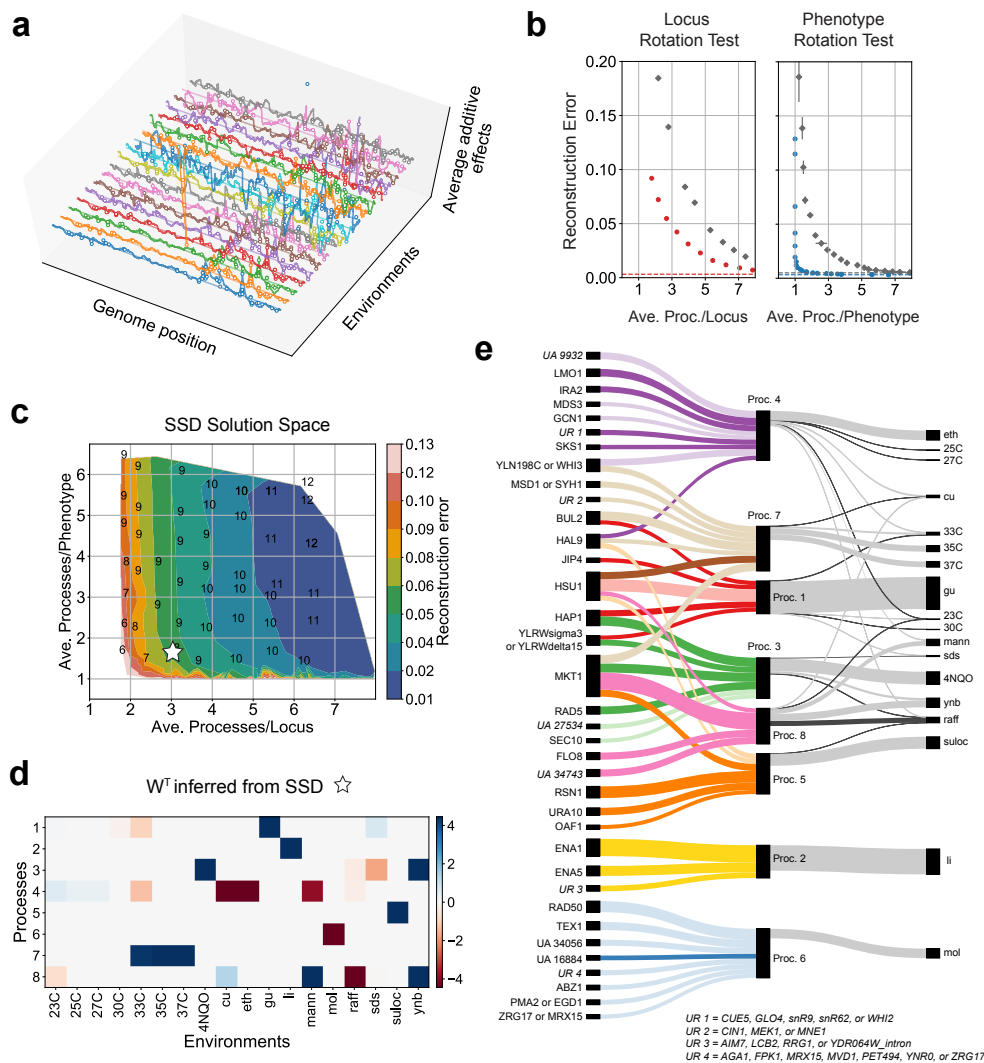

**FIG. 5: SSD on genotype-phenotype data from a yeast cross.** (a) The average additive effects of  $S \approx 42,000$  genetic loci, estimated using unpenalized linear regression for each of the 18 environments independently. The environments are arranged from bottom to top as arranged in panel d from left to right. Note that the correlations in average additive effects across neighboring loci due to linkage. (b) The loci and phenotype rotation tests, showing extensive sparsity in the process-phenotype map and moderate sparsity in the locus-process map. (c) The solution space has a landscape reflecting the sparsity in the process-phenotype map. The solution picked for downstream analysis is starred. (d) The process-phenotype map,  $W$ . (e) A Sankey figure illustrating the locus-process map  $M$  for the large effect loci in each core process (color) and the process-phenotype map  $W$  (grey). The width of each line is proportional to the magnitude of the value in  $M$  or  $W$ . In  $M$ , the lighter (darker) shade of each color indicates that the RM (BY) allele contributes positively (negatively) to the process. In  $W$ , light and dark grey indicate positive and negative contributions to the phenotypic measurement respectively. The signs of the core processes are adjusted so that they impact most phenotypic values positively.

398 [26] includes an extensive discussion of the challenges associated with this inference and  
 399 introduces a modified stepwise forward search procedure for this purpose. A particular

400 difficulty is that this mapping is typically not able to precisely pinpoint specific loci that  
401 affect each phenotype. Because our goal is to use the genotype-phenotype map across  
402 these different environments to infer lower-dimensional latent structure, we adopt a simpler  
403 approach here. Instead of identifying putative causal loci separately for each phenotype, we  
404 use a penalized regression approach to jointly identify a sparse set of loci that explain the  
405 fitness across environments (see SI). Then, we use a statistical test to establish a confidence  
406 interval for the location of each putative causal locus. This procedure identifies 1089 genomic  
407 regions containing putative loci and their fitness effects in the 18 environments. We use this  
408  $18 \times 1089$  matrix as the effects matrix  $\mathbf{F}$  for SSD, represented schematically in Figure 5a.

409 We next apply the loci and phenotype rotation tests (Figure 5b), finding evidence for  
410 extensive sparsity in the process-phenotype map  $\mathbf{W}$  and moderate levels of sparsity in the  
411 locus-processes map  $\mathbf{M}$ . The SSD solution space shows an error landscape that favors low-  
412 rank ( $K \approx 6 - 9$ ) approximations to  $\mathbf{F}$  which are sparse in  $\mathbf{W}$  (Figure 5c). We focus here  
413 on the  $K = 8$  solution indicated by the white star in Figure 5c, which represents a trade-off  
414 between achieving high sparsity in  $\mathbf{W}$  and moderate sparsity in  $\mathbf{M}$  while retaining relatively  
415 low reconstruction error. We verified that this solution explains a fraction of variance on a  
416 test set of genotypes comparable to that explained by the full  $\mathbf{F}$  and the 8-component SVD  
417 solution (Figure S7a). Other reasonable choices of solutions lead to qualitatively similar  
418 results (Figure S7b).

419 In Figure 5d we show the resulting inferred  $\mathbf{W}$ . We find that this matrix is sparse and  
420 has some intuitive features. First, we note that the term  $\mathbf{b}$  in our SSD decomposition rep-  
421 resents a constant effect of each locus on all of the measured phenotypes (i.e. the aspect  
422 of the genotype-phenotype map that is constant across all the environments). The inferred  
423  $\mathbf{W}$  then represents how the loci in a given process produce deviations from these constant  
424 effects across the different environments. We find that none of the inferred processes have  
425 substantial weight in  $\mathbf{W}$  for our 30°C environment, indicating that  $\mathbf{b}$  fully captures the  
426 genotype-phenotype map for this environment. This is intuitive, given that this environ-  
427 ment is the basis for all other conditions. The environments which represent this same  
428 condition at slightly lower temperatures are also largely captured by  $\mathbf{b}$ , though processes 4  
429 and 8 do become slightly more important as we decrease the temperature. As we increase  
430 temperature, we find that process 7 becomes important, suggesting that this process is asso-  
431 ciated with high temperature response. Several processes are specific to given environments

432 (e.g. process 1 primarily affects fitness in guanidinium chloride (gu), process 2 affects fit-  
433 ness in lithium (li), process 5 in suloctidil (suloc), and 6 in molasses (mol)). Some of these  
434 processes, such as processes 2 and 6, contain a largely non-overlapping set of loci that affect  
435 their respective environments (li and mol) in addition to the constant effects captured by  
436 **b**. Finally, processes 3, 4, and 8 reflect processes that influence a few conditions, including  
437 some observed trade-offs (e.g. between fitness in raffinose and ynb or mannose).

438 In SI Table 1, we provide a list of the ORFs localized to each putative causal locus,  
439 GO annotations and descriptions from the Saccharomyces Genome Database [27], and their  
440 influence on each core process (i.e. value in  $\mathbf{M}$ ). In Figure 5e we show a Sankey figure  
441 that illustrates  $\mathbf{W}$  and the most prominent features of  $\mathbf{M}$ . This figure shows both how a  
442 number of key loci affect each of the processes (i.e. features of  $\mathbf{M}$ ), and how these processes  
443 in turn affect fitness in each of the environments (i.e.  $\mathbf{W}$ ). For example, we see that the  
444 genes ENA1 and ENA5 are the primary contributions to process 2, and that this process  
445 primarily influences fitness in lithium. This is consistent with prior expectations, as the ENA  
446 cluster is involved in salt tolerance and is known to be important for lithium tolerance [28].  
447 Similarly, we see that BUL2, known to affect heat-shock element mediated gene expression  
448 (see SI Table 1), is the primary contributor to process 7, which influences fitness in the high  
449 temperature environments. In addition, some loci which are known to have large effects on  
450 fitness across these conditions (e.g. MKT1, IRA2) are also represented in  $\mathbf{M}$ . There are  
451 also many other loci (some of unknown function and other unannotated genes) that play  
452 a role, and the rationale for these patterns is unclear. Additional experiments measuring  
453 fitness across a larger set of environments may help further disentangle structure in this  
454 genotype-phenotype map, and help resolve additional processes.

#### 455 **IV. DISCUSSION**

456 Extensive work in quantitative genetics has aimed to develop models that explain the  
457 relationship between genotype and a variety of different phenotypes. This work often finds  
458 widespread pleiotropy, where specific genetic variants affect multiple phenotypes, creating  
459 a complex pattern of correlations between phenotypes. Using these patterns to infer a  
460 lower-dimensional structure in the map between genotype and multiple phenotypes is an  
461 important goal, which offers the promise of identifying a biologically meaningful explanation

462 for observed patterns of pleiotropy.

463 A central challenge in achieving this goal is that discovering lower-dimensional structure  
464 in high-dimensional data is fundamentally underdetermined. Thus, we must always choose  
465 some set of objective functions and/or constraints as the basis for any such decomposition.  
466 This choice is inherently somewhat arbitrary, and it is not immediately clear how to select  
467 objectives and constraints that will lead to solutions that reflect biologically meaningful  
468 structure in the data.

469 In this paper, we address this challenge by introducing a penalized matrix decomposition  
470 framework, *Sparse Structure Discovery* (SSD), which allows us to identify a low-dimensional  
471 set of “core processes” that concisely explains the observed patterns of pleiotropy in  
472 genotype-phenotype data. The method uses sparsity as a key constraint to decompose  
473 a model for how genotype influences multiple phenotypes into two linear sparse lower-  
474 dimensional maps: a map between the genetic loci and the set of putative core biological  
475 processes they affect, and a map explaining how these core processes determine the observed  
476 phenotypes. Using simulated data, we demonstrate that SSD can accurately recover the  
477 true locus-process and process-phenotype maps as long as at least one of them is sparse.  
478 We then apply the method to three empirical datasets, which include the fitness effects of  
479 adaptive mutations in different growth conditions, robustness of gene knockouts to a set of  
480 genotoxic agents, and the fitness effects of QTLs identified in a yeast cross.

481 SSD is a flexible method which offers a range of solutions that correspond to different  
482 strengths of the sparsity constraints on the locus-process and process-phenotype maps (for-  
483 mally, one unique solution per choice of the hyper-parameters that enforce sparsity). This  
484 choice could be made based on some prior biological expectations, or by using standard  
485 statistical approaches such as cross-validation to find the set of hyper-parameters that min-  
486 imizes generalization error. However, since our goal is to identify biologically meaningful  
487 low-dimensional structure rather than minimize generalization error, we explore the space of  
488 solutions found by SSD across a range of hyper-parameters, and use the reconstruction error  
489 landscape and proposed rotation tests to guide the examination of specific solutions. By  
490 exploring solutions with different levels of sparsity, we can examine features of the solutions  
491 which are robust to the choice of specific hyper-parameters.

492 Of course, the use of sparsity as the guiding constraint in our SSD method is a choice, and  
493 it would certainly be possible to identify alternative lower-dimensional decompositions of a

494 given dataset by choosing a different set of objectives and constraints. Our choice of sparsity  
495 is guided by two main factors. First, because we can use rotation tests to provide evidence  
496 for sparsity, we can demonstrate whether or not this constraint is appropriate directly from  
497 empirical data (and in cases where there is no evidence for sparsity, SSD should not be used).  
498 Second, intuitive notions of modularity in biological systems suggest that sparsity in  $\mathbf{M}$  and  
499  $\mathbf{W}$  may reflect characteristic features of biological organization. For example, sparsity in  
500 the locus-process map may reflect a situation where each gene participates in one or a few  
501 biological “modules” with specific defined functions, and each such module relies primarily  
502 on a relatively small fraction of all possible genes. Sparsity in the process-phenotype map  
503 may hold less generally, but could reflect scenarios where any observed phenotype typically  
504 depends primarily on a subset of all possible modules. We also note that our method only  
505 requires sparsity in one of these two maps, so it could be useful in scenarios where  $\mathbf{W}$  is  
506 sparse and  $\mathbf{M}$  is not, or vice versa.

507 Naturally, even in scenarios where a biological system has a modular structure and spar-  
508 sity seems intuitively appropriate, all biological processes are inherently coupled at some  
509 level. For example, the “omnigenic” model recently introduced by [29] suggests that most  
510 loci affect almost every complex trait. The omnigenic model reflects the observation that  
511 large numbers of small-effect loci often dominate the heritability of complex traits. This  
512 is not inconsistent with the sparsity-inducing  $\ell_1$  constraint used in SSD. Formally, the  $\ell_1$   
513 constraint reflects a prior assumption about the distribution (i.e., the spread) of effect sizes,  
514 namely, that a small subset of loci have much larger effect sizes than most other loci that  
515 affect each process. In contrast, an  $\ell_2$  constraint, for example, imposes a prior with a tighter  
516 spread of effect sizes. This constraint will instead lead to a dense (and non-unique) set of  
517 solutions. The sparsity assumption thus remains valid as long as the effects of mutations  
518 in the core genes of a pathway are significantly larger than the small effects of the genes  
519 outside the pathway, even if there are so many such small-effect genes that they dominate  
520 the heritability of the trait.

521 By using sparsity as a key constraint, our approach produces a different lower-dimensional  
522 latent structure in the data than singular value decomposition (SVD), a commonly used  
523 method which finds the subspace of a chosen dimensionality that achieves the lowest error  
524 in reconstructing the effects matrix (without any additional constraints). By construction,  
525 SVD produces a set of processes (formally, basis vectors that span this subspace) which

526 are orthogonal and which are ordered monotonically based on the variation explained by  
527 each process. Previous work [15] has shown that SVD applied to a subset of mutations and  
528 similar environments generalizes to a held-out set of mutations and dissimilar environments,  
529 which suggests that SVD can be fruitfully used to identify an appropriate low-dimensional  
530 subspace of processes. However, any set of independent basis vectors which span the sub-  
531 space will lead to the same generalization error. That is, even though SVD achieves good  
532 generalization performance by finding the optimal lower-dimensional decomposition of the  
533 genotype-phenotype map, it does not necessarily lead to a unique set of biologically mean-  
534 ingful processes.

535 Our approach is similar in spirit to Webster, a method based on graph-based dictionary  
536 learning introduced recently by Pan *et. al.* [17]. Like SSD, Webster relies on a penalized  
537 matrix decomposition framework to identify the locus-process and process-phenotype maps.  
538 However, Webster imposes a hard constraint that each locus affects at most two processes  
539 and imposes no sparsity constraint on the process-phenotype map. In contrast to Webster,  
540 SSD finds sparser solutions with an equivalent reconstruction error, and variable degrees of  
541 pleiotropy across loci.

542 We emphasize that the processes identified by SSD or any other method are fundamentally  
543 constrained by the genotypes we study and the phenotypes we choose to measure. We cannot  
544 hope to resolve any effects of loci that do not vary across the genotypes we analyze. Thus, it  
545 is important to consider the nature of the genetic variation in a given study in interpreting  
546 the results of an SSD decomposition: if a given type of variant is not represented, we may  
547 fail to identify core processes which depend on those variants. Moreover, it is important to  
548 note that expanding a dataset by including additional genotypes can in principle change the  
549 inferred structure.

550 Similarly, the constant effects of loci on all the measured phenotypes are represented by  
551 the  $\mathbf{b}$  term in SSD. This reflects the effects of loci on phenotypes that cannot be resolved  
552 by the variation in the measured phenotypes. For example, if some core process influences  
553 a given type of stress response and we did not measure any phenotypes that depend on that  
554 particular type of stress, we would expect the effects of this core process to be absorbed into  
555  $\mathbf{b}$  along with all other processes whose effects do not vary across the measured phenotypes.  
556 By measuring additional phenotypes, we could hope to begin to resolve these processes,  
557 though our success in doing so would depend on the phenotypes chosen.



558 We note that by using a matrix decomposition framework, we have implicitly made  
559 several important assumptions about the structure of the genotype-phenotype map. First,  
560 we have ignored the effects of interactions between loci on the core processes. In other  
561 words, we assume that the effect of each locus on each core process does not depend on  
562 other loci. Second, the process-phenotype map is assumed to be a linear function of the  
563 core processes. Nonlinear structure in the locus-process and process-phenotype maps will  
564 lead to structured epistasis between loci in the genotype-phenotype data. This structure is  
565 in principle resolvable by measuring epistatic effects between loci for different phenotypes.  
566 However, we have focused here on the additive effects matrix, because this is both simpler  
567 and can be more reliably estimated given the scope of current data sets.

568 Finally, our study and others [15, 17] assume a strictly hierarchical genotype to process  
569 to phenotype map. That is, we assume that the genotype determines the core processes,  
570 which in turn determine the observed phenotypes. This structure has some intuitive appeal,  
571 and it is central to any latent structure discovery method of this type. However, it may  
572 not always hold in reality. For example, one can imagine a scenario where the effects of  
573 mutations on one core process depend on the state of another core process (in other words,  
574 core processes affect mutational effects in addition to phenotypes). Our method (along with  
575 other matrix decomposition approaches such as SVD) is fundamentally unsuited to describe  
576 such scenarios, and developing methods to infer the structure of this and other more general  
577 types of genotype-phenotypes maps is an important goal for future work.

578 **Availability of code and data.** Our code and a link to the data is available at [https:](https://github.com/spetti/sparse-structure-discovery)  
579 [//github.com/spetti/sparse-structure-discovery](https://github.com/spetti/sparse-structure-discovery).

580 **Acknowledgements.** We thank Andrew Murray and members of the Desai lab for useful  
581 discussions. We thank Eliot Fenton for giving us access to his scripts to help process the data  
582 from the BBQ experiments. S.P and G.R were partially supported by the NSF-Simons Cen-  
583 ter for Mathematical & Statistical Analysis of Biology at Harvard (award number #1764269)  
584 and the Harvard Quantitative Biology Initiative. M.M.D acknowledges support from the Si-

585 mons Foundation (grant 376196), NSF Grant PHY-1914916, and NIH grant R01GM104239.

---

- 586 [1] G. P. Wagner and J. Zhang, The pleiotropic structure of the genotype–phenotype map: the  
587 evolvability of complex organisms, *Nature Reviews Genetics* **12**, 204 (2011).
- 588 [2] A. B. Paaby and M. V. Rockman, The many faces of pleiotropy, *Trends in genetics* **29**, 66  
589 (2013).
- 590 [3] S. Haworth, R. Mitchell, L. Corbin, K. H. Wade, T. Dudding, A. Budu-Aggrey, D. Carslake,  
591 G. Hemani, L. Paternoster, G. D. Smith, *et al.*, Apparent latent structure within the uk  
592 biobank sample has implications for epidemiological analysis, *Nature communications* **10**, 1  
593 (2019).
- 594 [4] G. Davey Smith and G. Hemani, Mendelian randomization: genetic anchors for causal infer-  
595 ence in epidemiological studies, *Human molecular genetics* **23**, R89 (2014).
- 596 [5] N. Solovieff, C. Cotsapas, P. H. Lee, S. M. Purcell, and J. W. Smoller, Pleiotropy in complex  
597 traits: challenges and strategies, *Nature Reviews Genetics* **14**, 483 (2013).
- 598 [6] M. V. Rockman, Reverse engineering the genotype–phenotype map with natural genetic vari-  
599 ation, *Nature* **456**, 738 (2008).
- 600 [7] Z. Zhang, Y. Xu, J. Yang, X. Li, and D. Zhang, A survey of sparse representation: algorithms  
601 and applications, *IEEE access* **3**, 490 (2015).
- 602 [8] B. A. Olshausen and D. J. Field, Sparse coding with an overcomplete basis set: A strategy  
603 employed by v1?, *Vision research* **37**, 3311 (1997).
- 604 [9] Y.-X. Wang and Y.-J. Zhang, Nonnegative matrix factorization: A comprehensive review,  
605 *IEEE Transactions on knowledge and data engineering* **25**, 1336 (2012).
- 606 [10] P. Paatero and U. Tapper, Positive matrix factorization: A non-negative factor model with  
607 optimal utilization of error estimates of data values, *Environmetrics* **5**, 111 (1994).
- 608 [11] D. Lee and H. S. Seung, Algorithms for non-negative matrix factorization, *Advances in neural*  
609 *information processing systems* **13** (2000).
- 610 [12] A. Hyvärinen and E. Oja, Independent component analysis: algorithms and applications,  
611 *Neural networks* **13**, 411 (2000).
- 612 [13] C. Jutten and J. Herault, Blind separation of sources, part i: An adaptive algorithm based  
613 on neuromimetic architecture, *Signal processing* **24**, 1 (1991).

- 614 [14] P. Comon, Independent component analysis, a new concept?, *Signal processing* **36**, 287 (1994).
- 615 [15] G. Kinsler, K. Geiler-Samerotte, and D. A. Petrov, Fitness variation across subtle environ-  
616 mental perturbations reveals local modularity and global pleiotropy of adaptation, *Elife* **9**,  
617 e61271 (2020).
- 618 [16] G. H. Golub and C. Reinsch, Singular value decomposition and least squares solutions, in  
619 *Linear algebra* (Springer, 1971) pp. 134–151.
- 620 [17] J. Pan, J. J. Kwon, J. A. Talamas, A. A. Borah, F. Vazquez, J. S. Boehm, A. Tsherniak,  
621 M. Zitnik, J. M. McFarland, and W. C. Hahn, Sparse dictionary learning recovers pleiotropy  
622 from human cell fitness screens, *Cell systems* **13**, 286 (2022).
- 623 [18] Y. Yankelevsky and M. Elad, Dual graph regularized dictionary learning, *IEEE Transactions*  
624 *on Signal and Information Processing over Networks* **2**, 611 (2016).
- 625 [19] M. Olivieri, T. Cho, A. Álvarez-Quilón, K. Li, M. J. Schellenberg, M. Zimmermann,  
626 N. Hustedt, S. E. Rossi, S. Adam, H. Melo, *et al.*, A genetic map of the response to dna  
627 damage in human cells, *Cell* **182**, 481 (2020).
- 628 [20] L. Altenberg, Modularity in evolution: some low-level questions, in *Modularity: understanding*  
629 *the development and evolution of complex natural systems* (MIT Press Cambridge, 2005) pp.  
630 99–128.
- 631 [21] A. Crombach and P. Hogeweg, Evolution of evolvability in gene regulatory networks, *PLoS*  
632 *computational biology* **4**, e1000112 (2008).
- 633 [22] G. P. Wagner, M. Pavlicev, and J. M. Cheverud, The road to modularity, *Nature Reviews*  
634 *Genetics* **8**, 921 (2007).
- 635 [23] A. Hintze and C. Adami, Evolution of complex modular biological networks, *PLoS computa-*  
636 *tional biology* **4**, e23 (2008).
- 637 [24] J. Clune, J.-B. Mouret, and H. Lipson, The evolutionary origins of modularity, *Proceedings*  
638 *of the Royal Society b: Biological sciences* **280**, 20122863 (2013).
- 639 [25] M. Costanzo, A. Baryshnikova, J. Bellay, Y. Kim, E. D. Spear, C. S. Sevier, H. Ding, J. L.  
640 Koh, K. Toufighi, S. Mostafavi, *et al.*, The genetic landscape of a cell, *science* **327**, 425 (2010).
- 641 [26] A. N. N. Ba, K. R. Lawrence, A. Rego-Costa, S. Gopalakrishnan, D. Temko, F. Michor, and  
642 M. M. Desai, Barcoded bulk qtl mapping reveals highly polygenic and epistatic architecture  
643 of complex traits in yeast, *Elife* **11**, e73983 (2022).
- 644 [27] J. M. Cherry, E. L. Hong, C. Amundsen, R. Balakrishnan, G. Binkley, E. T. Chan, K. R.

- 645 Christie, M. C. Costanzo, S. S. Dwight, S. R. Engel, *et al.*, Saccharomyces genome database:  
646 the genomics resource of budding yeast, *Nucleic acids research* **40**, D700 (2012).
- 647 [28] J. Wieland, A. M. Nitsche, J. Strayle, H. Steiner, and H. K. Rudolph, The pmr2 gene cluster  
648 encodes functionally distinct isoforms of a putative na<sup>+</sup> pump in the yeast plasma membrane.,  
649 *The EMBO Journal* **14**, 3870 (1995).
- 650 [29] E. A. Boyle, Y. I. Li, and J. K. Pritchard, An expanded view of complex traits: from polygenic  
651 to omnigenic, *Cell* **169**, 1177 (2017).
- 652 [30] C. Eckart and G. Young, The approximation of one matrix by another of lower rank, *Psy-*  
653 *chometrika* **1**, 211 (1936).
- 654 [31] D. M. Witten, R. Tibshirani, and T. Hastie, A penalized matrix decomposition, with applica-  
655 tions to sparse principal components and canonical correlation analysis, *Biostatistics* **10**, 515  
656 (2009).
- 657 [32] M. Aharon, M. Elad, and A. Bruckstein, K-svd: An algorithm for designing overcomplete  
658 dictionaries for sparse representation, *IEEE Transactions on signal processing* **54**, 4311 (2006).
- 659 [33] J. A. Tropp and A. C. Gilbert, Signal recovery from random measurements via orthogonal  
660 matching pursuit, *IEEE Transactions on information theory* **53**, 4655 (2007).
- 661 [34] H. Lee, A. Battle, R. Raina, and A. Ng, Efficient sparse coding algorithms, *Advances in neural*  
662 *information processing systems* **19** (2006).
- 663 [35] J. Mairal, F. Bach, J. Ponce, and G. Sapiro, Online dictionary learning for sparse coding,  
664 in *Proceedings of the 26th annual international conference on machine learning* (2009) pp.  
665 689–696.
- 666 [36] K. Gregor and Y. LeCun, Learning fast approximations of sparse coding, in *Proceedings of*  
667 *the 27th international conference on international conference on machine learning* (2010) pp.  
668 399–406.
- 669 [37] D. Müllner, *Modern hierarchical, agglomerative clustering algorithms* (2011).
- 670 [38] A. B. Owen and P. O. Perry, Bi-cross-validation of the svd and the nonnegative matrix fac-  
671 torization, *The annals of applied statistics* **3**, 564 (2009).
- 672 [39] N. Simon, J. Friedman, T. Hastie, and R. Tibshirani, Regularization paths for cox’s propor-  
673 tional hazards model via coordinate descent, *Journal of Statistical Software* **39**, 1 (2011).
- 674 [40] C. Jiang and Z.-B. Zeng, Multiple trait analysis of genetic mapping for quantitative trait loci.,  
675 *Genetics* **140**, 1111 (1995).

- 676 [41] S. A. Knott and C. S. Haley, Multitrait least squares for quantitative trait loci detection,  
677 *Genetics* **156**, 899 (2000).
- 678 [42] C. Xu, X. Wang, Z. Li, and S. Xu, Mapping qtl for multiple traits using bayesian statistics,  
679 *Genetics Research* **91**, 23 (2009).
- 680 [43] S. Banerjee, B. S. Yandell, and N. Yi, Bayesian quantitative trait loci mapping for multiple  
681 traits, *Genetics* **179**, 2275 (2008).
- 682 [44] S. Xu, *Principles of statistical genomics*, Vol. 571 (Springer, 2013).
- 683 [45] J. Qian, Y. Tanigawa, W. Du, M. Aguirre, C. Chang, R. Tibshirani, M. A. Rivas, and  
684 T. Hastie, A fast and scalable framework for large-scale and ultrahigh-dimensional sparse  
685 regression with application to the uk biobank, *PLoS genetics* **16**, e1009141 (2020).

## 686 SUPPLEMENTARY INFORMATION

### 687 1. Definitions

- 688 1. *Average processes per locus.* Total number of non-zero values in  $\mathbf{M}$  divided by the  
689 number of columns in  $\mathbf{M}$  with at least one non-zero value. This definition excludes  
690 loci that affect no processes.
- 691 2. *Average processes per phenotype.* Total number of non-zero values in  $\mathbf{W}$  divided by  
692 the number of rows in  $\mathbf{W}$  with at least one non-zero value. This definition excludes  
693 phenotypes that use no processes apart from the linear term  $\mathbf{b}$ .
- 694 3. *k-component SVD decomposition.* As with our SSD method, we include a linear term in  
695 our decomposition to capture the effects of the loci that do not vary across phenotypes.  
696 Given  $\mathbf{F}$ , we let  $\mathbf{b}$  be the mean effect of each locus across phenotypes (i.e. the  $L$ -  
697 dimensional vector where the  $i^{th}$  value is the mean of the  $i^{th}$  column of  $\mathbf{F}$ ). Given the  
698 SVD of a matrix  $\mathbf{F} - \mathbf{b} = U\Sigma V^T$ , the  $k$ -component SVD decomposition of  $\mathbf{F} - \mathbf{b}$  has  
699  $\mathbf{M}$  equal to the first  $k$  rows of  $V^T$  and  $\mathbf{W}$  equal to the first  $k$  columns of  $U$  with each  
700 column scaled by the corresponding diagonal element of  $\Sigma$ . The process, expressed as  
701  $L$ -dimensional vectors (rows of  $\mathbf{M}$ ), are of unit length, as is the case for decompositions  
702 found by our SSD method.
- 703 4. *Reconstruction error.* The reconstruction error of the approximation  $\mathbf{F} \approx \mathbf{WM} + \mathbf{b}$

704 is the squared Frobenius norm of the difference between  $\mathbf{F}$  and the approximation  
 705 divided by the number of entries in  $\mathbf{F}$ :  $\|\mathbf{F} - (\mathbf{W}\mathbf{M} + \mathbf{b})\|_2^2 / (E \cdot L)$ .

706 5. *Cosine error.* To compare the similarity of a decomposition  $\hat{\mathbf{M}}, \hat{\mathbf{W}}$  to the true decom-  
 707 position  $\mathbf{M}, \mathbf{W}$  (for synthetic data), we first adjust  $\hat{\mathbf{M}}$  and  $\hat{\mathbf{W}}$  to best align the core  
 708 processes. First, we select the pair of rows  $\mathbf{M}_{k,:}$  and  $\hat{\mathbf{M}}_{j,:}$  with the highest absolute  
 709 value of cosine between them and assign  $\hat{\mathbf{M}}_{j,:}$  and  $\hat{\mathbf{W}}_{:,j}$  to the  $k^{\text{th}}$  row and column of  
 710 the adjusted matrices  $\hat{\mathbf{M}}^P$  and  $\hat{\mathbf{W}}^P$  respectively. Further if the cosine between  $\mathbf{M}_{k,:}$   
 711 and  $\hat{\mathbf{M}}_{j,:}$  is negative, we multiply the  $k^{\text{th}}$  row and column of  $\hat{\mathbf{M}}^P$  and  $\hat{\mathbf{W}}^P$  (respec-  
 712 tively) by negative one. We repeat this process, excluding the rows in  $\mathbf{M}$  and  $\hat{\mathbf{M}}$  that  
 713 have already been paired. This process permutes and changes the sign of the core  
 714 processes, but does not change the approximation:  $\hat{\mathbf{W}}\hat{\mathbf{M}} = \hat{\mathbf{W}}^P \hat{\mathbf{M}}^P$ .

715 The mean cosine error for  $\mathbf{M}$  measures the similarity between the pairs of correspond-  
 716 ing core processes, viewed as  $L$ -dimensional vectors:  $\frac{1}{K} \sum_{i=1}^K \left(1 - \cos\langle \mathbf{M}_{i,:}, \hat{\mathbf{M}}_{i,:}^P \rangle\right)$ .

717 The mean cosine error for  $\mathbf{W}$  measures the extent to which each phenotype uses the  
 718 corresponding process similarly:  $\frac{1}{E} \sum_{i=1}^E \left(1 - \cos\langle \mathbf{W}_{i,:}, \hat{\mathbf{W}}_{i,:}^P \rangle\right) \mathbb{1}\{\mathbf{W}_{i,:} \neq 0 \text{ or } \hat{\mathbf{W}}_{i,:}^P \neq$   
 719  $0\}$ . The indicator function ensures that the phenotypes affected by no core processes  
 720 (other than the linear term) in both the true and predicted decompositions do not  
 721 contribute to the error.

## 722 2. Sparse Structure Discovery

SSD takes as input the additive effects matrix  $\mathbf{F}$ , an upper bound on the desired number  
 of processes  $K_{\max}$ , and the regularization parameters  $\lambda_W, \lambda_M$ . It returns  $\mathbf{M}, \mathbf{W}$  and  $\mathbf{b}$  that  
 approximately minimize

$$\mathcal{C}(\mathbf{W}, \mathbf{M}, \mathbf{b}) = \|\mathbf{F} - (\mathbf{W}\mathbf{M} + \mathbf{b})\|_2^2 + \lambda_W \|\mathbf{W}\|_1 + \lambda_M \|\mathbf{M}\|_1 \quad (2)$$

such that  $\|\mathbf{M}_{k,:}\|_2 = 1$  for all  $1 \leq k \leq K_{\max}$ .

723 Initially  $\mathbf{b}$  is set to the column means of  $\mathbf{F}$ , and  $\mathbf{W}$  and  $\mathbf{M}$  are found by taking the Singular  
 724 Value Decomposition (SVD) of  $\mathbf{F} - \mathbf{b}$  with the top  $K_{\max}$  singular vectors. We then alternately  
 725 (i) fix  $\mathbf{W}$  and find  $\mathbf{M}$  and  $\mathbf{b}$  that optimize (2), (ii) normalize the rows of  $\mathbf{M}$ , (iii) fix  $\mathbf{M}$  and

726  $\mathbf{b}$  and find  $\mathbf{W}$  that optimizes (2). While the objective function (1) is not jointly convex in  
727  $\mathbf{W}$  and  $\mathbf{M}$ , the optimization problems in (i) and (iii) are each convex and can be efficiently  
728 solved.

729 In order to use comparable regularization values and obtain comparable errors across  
730 input matrices  $\mathbf{F}$  with different sizes and magnitudes, we normalize the input matrix  $\mathbf{F}$   
731 before performing SSD and the rotation tests. To normalize  $\mathbf{F}$ , we divide each entry by the  
732 standard deviation of all the values in  $\mathbf{F}$ . In both the SSD solution space plots and the  
733 rotation tests, the reported reconstruction error is with respect to this normalized version  
734 of  $\mathbf{F}$ . After normalization, the reconstruction error can be interpreted as the fraction of  
735 variance unexplained by the decomposition.

736 For each application, we apply our method with 625 pairs of regularization parameters:  
737 25 values of  $\lambda_W$  uniformly distributed between  $10^{-3}$  and 1.5 in logscale and 25 values of  $\lambda_M$   
738 uniformly distributed between  $10^{-4}$  and  $10^{-2}$  in logscale. We choose  $K_{\max}$  as the minimum  
739 number of SVD components needed to explain at least 95% of the variance in  $\mathbf{F} - \mathbf{b}$ .  
740 Choosing  $K_{\max} < \min\{E, L\}$  speeds up the method. Recall that the optimization procedure  
741 automatically picks an appropriate number of processes  $K \leq K_{\max}$  for a given  $\lambda_M, \lambda_W$ .

#### 742 a. *Comparison to other penalized matrix decomposition methods*

743 Our Sparse Structure Discovery method is a form of penalized matrix decomposition. It  
744 is well-known that the low rank matrix decomposition that gives the best approximation of a  
745 matrix with respect to the Frobenius norm can be computed via the singular value decompo-  
746 sition (SVD) (see [30]). Penalized matrix decomposition refers to a broader range of matrix  
747 decomposition formulations whose objectives are to both minimize the Frobenius norm of  
748 the approximation and to encourage the matrix factors to exhibit particular properties (e.g.  
749 sparsity) through hard constraints or regularization [31].

750 One form of penalized matrix decomposition is *sparse coding*, where the goal is to identify  
751 an overcomplete set of basis vectors, often called dictionary elements, so that each data point  
752 can be written as a combination of a small number of dictionary elements. This approach  
753 was used by Field and Olshausen to identify putative receptive fields of cells in the visual  
754 cortex [8]. The computer science and statistics literature has developed various formulations  
755 of sparse coding and accompanying efficient algorithms for finding the dictionary elements

756 [7]. Algorithms for sparse coding formulations that impose an  $L_0$  penalty on the use of  
757 dictionary elements are studied in [18, 32, 33]. Algorithms for the more tractable convex  
758 relaxation with an  $L_1$  penalty are studied in [34–36]. In Appendix 6 we further discuss the  
759 graph-regularized approach introduced in [18] and applied to the genotoxin data set in [17].

760 The key difference between SSD and sparse coding is that we enforce sparsity in both  
761 the dictionary elements ( $\mathbf{M}$  matrix) and the description of the data as combinations of  
762 the dictionary elements ( $\mathbf{W}$  matrix). This is motivated by our observation that sparse  
763 solutions can be found for both  $\mathbf{W}$  and  $\mathbf{M}$  in empirical genotype-phenotype maps with a  
764 marginal increase in reconstruction error. In contrast, standard sparse coding approaches  
765 do not constrain the sparsity of the dictionary elements. Additionally, the vector  $\mathbf{b}$  in (2) is  
766 introduced to capture the effects of loci on processes that do not have a variable effect on  
767 the measured phenotypes.

### 768 3. Rotation tests for locus and phenotype sparsity

769 For both tests, we first subtract out the mean effect of each locus across phenotypes to  
770 approximate  $\mathbf{b}$ , the effects that do not vary across phenotypes. Then, we normalize  $\mathbf{F}$  and  
771 select  $K_{\max}$  as described in Section 2. For the locus-rotation test, we rotate the rows of  $\mathbf{F}$   
772 randomly by right-multiplying by a random  $L \times L$  orthogonal matrix  $\mathbf{O}$  drawn from the Haar  
773 distribution, as implemented by SciPy’s `stat.orthogroup` library. We apply our SSD method  
774 directly to  $\mathbf{FO}$  (without normalizing) for 25 values of  $\lambda_M$  uniformly distributed between  
775  $10^{-4}$  and  $10^{-2}$  in logscale and  $\lambda_W = 10^{-3}$ . For the phenotype-rotation test, we left-multiply  
776  $\mathbf{F}$  by a random  $E \times E$  orthogonal matrix  $\mathbf{O}'$  drawn from the Haar distribution and apply  
777 SSD to  $\mathbf{O}'\mathbf{F}$  for 25 values of  $\lambda_W$  uniformly distributed between  $10^{-3}$  and 1.5 in logscale and  
778  $\lambda_M = 10^{-4}$ .

### 779 4. Synthetic data with hub-and-spoke structure

780 To test our SSD method on data with more complex underlying structure, we generated  
781 synthetic data with a hub-and-spoke structure, as illustrated in Figure S2a. We constructed  
782 eight  $H$ -processes and four  $P$ -processes. Each of  $L = 200$  loci participated in each process  
783 independently with probability 0.2, the weights of the participating loci were drawn indepen-



784 dently from a standard normal, and the rows of  $\mathbf{M}$  were normalized. We then constructed  
785 20 groups of 5 phenotypes: one hub phenotype and four perturbations of the hub phenotype,  
786 which we call spokes. The hub phenotype depends on two randomly selected  $H$ -processes  
787 with weights drawn independently from a standard normal. Each spoke phenotype is a sum  
788 of the hub phenotype and one of the four  $P$ -processes multiplied by a scaling factor drawn  
789 from a standard normal. This construction yields a  $100 \times 12$  matrix  $\mathbf{W}$ , a  $12 \times 200$  matrix  $\mathbf{M}$   
790 and the fitness effect matrix  $\mathbf{F} = \mathbf{W}\mathbf{M} + \eta$ , where the noise  $\eta$  is drawn independently from  
791 a normal distribution with scale 0.3 times the standard deviation of the entries in  $\mathbf{W}\mathbf{M}$ .

792 This same  $\mathbf{F}$  can also be expressed as a decomposition  $\mathbf{F} = \bar{\mathbf{W}}\bar{\mathbf{M}} + \eta$  with 24 core  
793 processes and with more sparsity in  $\bar{\mathbf{W}}$  than  $\mathbf{W}$  and far less sparsity in  $\bar{\mathbf{M}}$  than  $\mathbf{M}$ , see  
794 Figure S2b. To obtain  $\bar{\mathbf{W}}$ , we keep the four  $P$ -processes and construct an  $S$ -process for each  
795 of the 20 hub phenotypes. Instead of expressing each hub phenotype as the weighted sum  
796 of two  $H$ -processes, each hub phenotype is now represented by single  $S$ -process.

## 797 5. Analysis of adaptive mutations in yeast (Kinsler et. al. dataset)

798 The dataset in Kinsler et. al. [15] contains the additive effects of 421 adaptive mutations  
799 in 45 environments. We chose a subset of 288 mutations using the procedure described  
800 in the original work. Specifically, mutations that were either not sequenced, whose mean  
801 additive effect across the 8 evolutionary conditions was smaller than a threshold (0.05) or  
802 whose maximal error of the additive effect over all environments was larger than a threshold  
803 (0.5) were removed. The specific thresholds were not specified in Kinsler et. al.; we chose  
804 thresholds such that we were left with close to the total number of mutations analyzed in  
805 this work (i.e., 292).

### 806 a. Clustering mutations

807 Clustering of the  $\mathbf{M}$  matrix was performed through hierarchical/agglomerative clustering  
808 [37] (using the linkage function in SciPy's hierarchical clustering library) with an absolute  
809 cosine metric. Since our goal was to cluster loci with similar effect profiles on processes (i.e.,  
810 columns of  $\mathbf{M}$ ) independent of the overall sign and magnitude, we use a metric  $d(\mathbf{x}, \mathbf{y}) =$   
811  $1 - |\hat{\mathbf{x}} \cdot \hat{\mathbf{y}}|$ , where  $\mathbf{x}, \mathbf{y}$  are two vectors and  $\hat{\mathbf{x}} = \mathbf{x}/\|\mathbf{x}\|_2$  denotes the unit vector. The method

812 groups the loci into clusters depending on an input distance threshold. We found that for a  
813 large range of thresholds (0.15 to 0.93), the number of clusters ranged from 6 to 11. There  
814 was no sharp delineation within this range. We chose an intermediate threshold value 0.4,  
815 which led to 8 clusters. For the analysis with fewer diploids (Figure S4) we used a threshold  
816 value of 0.22 to obtain 8 clusters.

817 In Figure S5d, we present results from hierarchical/agglomerative clustering of the **M**  
818 found using SVD. We chose a distance threshold of 0.47 instead of 0.4 for the SSD solution  
819 in Figure 3d,e to obtain 9 clusters since we could not find a threshold which led to 8 clusters.  
820 Choosing a matching threshold of 0.4 led to 11 clusters.

#### 821 *b. Bi-cross-validation*

822 In this Section, we summarize the bi-cross-validation test described in [38] and applied in  
823 [15]. We split the 45 environments into train and test environments, and the 288 mutations  
824 into train and test mutations. In panel a of Figure S5, the train and test environments are  
825 the subtle (25) and strong perturbation (20) environments as defined in [15], respectively  
826 (Recall that environments in which the fitness effects differed slightly and significantly from  
827 the average fitness effects in the evolution condition were classified as subtle and strong  
828 perturbations respectively). In panel b, the training and test environments are chosen  
829 randomly in a 36:9 split.

830 Each result is averaged over eight random splits of the mutations into training and test  
831 sets. In each random split, the training set contains 60 training mutations and test set  
832 contains 228 test mutations. To split mutations, the number of mutations of each annotation  
833 (Diploids, IRA1-mis, IRA2, etc) that are included the training and test sets are decided as  
834 specified in [15]. The specific mutations assigned to each set are sampled randomly. For  
835 example, Kinsler et. al. assign 20 diploids to the training set and 168 diploids to the test set.  
836 The specific set of 20 diploids that are assigned to the training set for each of the 8 random  
837 seeds are sampled with equal probability from the full set of 188 diploids. As described in  
838 [15], the weighted reconstruction error is computed by normalizing the total reconstruction  
839 error for all mutations of an annotated class with the number of mutations in that class.  
840 This ensures that the performance on the diploids are not overrepresented in the results.

841 To obtain the bi-cross validation reconstruction error for each method, we first decompose

842  $\mathbf{F}$  on train environments and mutations into two matrices  $\mathbf{W}_1, \mathbf{M}_1$ . Fixing  $\mathbf{M}_1$ , we fit the  
843 process-phenotype map  $\mathbf{W}_2$  for the test environments and train mutations. Similarly, fixing  
844  $\mathbf{W}_1$ , we fit the locus-process map  $\mathbf{M}_2$  for the test mutations and train environments. The  
845 predicted loci-phenotype map on test environments and mutations is then  $\mathbf{W}_2\mathbf{M}_2$ . To  
846 compare SVD and SSD on an equal footing, we first subtract from  $\mathbf{F}$  the mean of  $\mathbf{F}$  across  
847 environments for each locus.

## 848 6. Comparison to Webster method on genotoxin dataset

849 SSD differs from Webster in three key ways. First, Webster imposes locus-sparsity as a  
850 hard constraint; each locus participates in at most  $j$  core processes where  $j$  is an input param-  
851 eter. In contrast, SSD allows loci to participate in different numbers of core processes, allow-  
852 ing the loci to exhibit varying degrees of pleiotropy. Second, whereas phenotype-sparsity is a  
853 tunable parameter in SSD, Webster does not enforce phenotype-sparsity. Finally, Webster's  
854 optimization includes graph regularization objectives that encourage each locus to have a  
855 similar core process membership profile as its five closest neighbors, and analogously for  
856 phenotypes. This arbitrary cutoff of five could cause problems for a locus or phenotype that  
857 is significantly dissimilar from all others.

858 We first select SSD solutions to compare to the Webster decomposition of the genotoxin  
859 dataset [19] presented in [17]. In the Webster decomposition each locus participates in  
860 exactly two of ten core processes. We selected the most comparable SSD solution (ten  
861 processes, 2.0 average-processes-per-loci, 6.8 average-processes-per-genotoxin), as well as the  
862 SSD solution we selected using the rotation tests as a guide (illustrated by the white star in  
863 Figure 4, ten processes, 3.3 average-processes-per-loci, 2.5 average-processes-per-genotoxin),  
864 and the 10-process SVD solution.

865 Next, we compared the unnormalized reconstruction error for each genotoxin between the  
866 two SSD solutions described above, the SVD decomposition, and the Webster method (left  
867 column in Figure S6). Predictably, the methods with less strict sparsity requirements give  
868 lower mean error (SVD 1.4, selected SSD solution 2.6, most comparable SSD solution 2.9,  
869 Webster 3.3). Unlike Webster, our SSD method allows the number of processes that each  
870 locus participates in to vary, reflecting the possibility that loci may exhibit different levels  
871 of pleiotropy (right column Figure S6). This flexibility may account for the improved pre-

872 dictions of our SSD solutions over Webster at the same average locus-sparsity. As displayed  
873 in Figure S6 center column, the process-genotoxin maps from the SSD solutions are more  
874 sparse.

875 Of the sparse solutions, our selected SSD solution most accurately reconstructs the addi-  
876 tive effects matrix and exhibits the most genotoxin-sparsity (see Figure S6, center column).  
877 Moreover, the locus-sparsity of this solution is sufficient to assign putative biological func-  
878 tions for many of the core processes using predefined annotations (Figure 4d). This suggests  
879 that the SSD approach is a more promising method for generating biologically reasonable  
880 hypotheses about genetic architecture in this system.

## 881 7. Joint QTL mapping from large-scale genotype-phenotype measurements

882 Given an  $E \times N$  matrix  $\mathbf{Y}$  encoding  $E$  measured phenotypes of  $N$  individuals and an  $S \times N$   
883  $\{0, 1\}$ -valued matrix  $\mathbf{X}$  expressing the genotypes of the  $N$  individuals at  $S$  loci, our joint  
884 QTL mapping method identifies  $L < S$  putative causal loci which explain the majority of  
885 the predictable variation in the measured phenotypes. The output of our method is an  $E \times L$   
886 effects matrix  $\mathbf{F}$  which approximates the phenotypes as an additive function of the effects  
887 of these  $L$  loci. The key step in our method aligns loci across phenotypes using a penalized  
888 regression framework based on  $\ell_{2,1}$  regularization with a highly optimized implementation  
889 called *glmnet* [39]. Specifically, we minimize

$$890 \quad \mathcal{C}(\mathbf{F}, \mathbf{c}) = \|\mathbf{Y} - \mathbf{F}\mathbf{X} - \mathbf{c}\|^2 + \lambda_F \sum_{s=1}^S \|\mathbf{F}_{:,s}\|_2 \quad (3)$$

890 with respect to  $\mathbf{F}$  and  $\mathbf{c}$ , where  $\|\mathbf{F}_{:,s}\|_2 \equiv \sqrt{\sum_{e=1}^E \mathbf{F}_{es}^2}$ ,  $\lambda_F$  controls the strength of regular-  
891 ization and  $\mathbf{c}$  is an  $E \times 1$  intercept term. This  $\ell_{2,1}$  regularization penalty is a generalization  
892 of the well-known  $\ell_1$ -based Lasso to multiple outcomes. Like Lasso, the  $\ell_{2,1}$  penalty favors  
893 sparse solutions by selecting only the loci whose effects across phenotypes (as measured by  
894  $\|\mathbf{F}_{:,s}\|_2$ ) are sufficiently large, thus automatically identifying and aligning both large-effect,  
895 non-pleiotropic loci and loci that have small effects across many phenotypes.

896 In our yeast cross application, we have  $N \approx 100,000$  segregants and  $S \approx 42,000$  loci.  
897 Due to the scale of this data and strong correlations between neighboring loci from linkage,  
898 we avoid running *glmnet* on all 42,000 loci. We instead run *glmnet* on a smaller subset of

989 putative causal loci and develop a statistical method for computing confidence intervals to  
990 narrow down the true locations of each causal locus. Our pipeline is as follows:

- 901 1. Compute a reduced genotype matrix by restricting  $\mathbf{X}$  to a set of rows corresponding  
902 to loci that are pairwise correlated by no more than 94%. On our yeast dataset, this  
903 reduces  $S$  from  $\approx 42,000$  to 1579.
- 904 2. Perform  $\ell_{2,1}$ -regression on the reduced genotype matrix. On our yeast dataset, this  
905 yields 1314 putative causal loci (non-zero columns of  $\mathbf{F}$ ).
- 906 3. Construct a new list of putative casual loci that are more likely to be casual than  
907 the loci selected in Step 1. To do so, compute confidence intervals for each putative  
908 casual locus for each phenotype separately using the statistical method described in  
909 Section 7 a. When the confidence intervals for a single locus do not overlap, it suggests  
910 that the locus is summarizing the effect of multiple distinct nearby causal loci. We  
911 “split” the locus by adding a set of loci to the new list such that each phenotype’s  
912 confidence interval contains at least one locus in the set. When the confidence intervals  
913 for a locus overlap across all phenotypes, we add the locus from the intersection with  
914 the strongest evidence of being causal to the new list. The same locus may appear  
915 multiple times on the new list, suggesting that the  $\ell_{2,1}$  optimization assigned the effect  
916 of a single locus to two (or more) nearby loci. After removing such redundancies, the  
917 new list contains 1119 loci for our yeast dataset.
- 918 4. Perform  $\ell_{2,1}$ -regression on the genotype matrix restricted to the new list of putative  
919 casual loci. We use this  $\mathbf{F}$  in downstream analysis. On our yeast dataset, this yields  
920 1089 putative casual loci (non-zero columns of  $\mathbf{F}$ ).
- 921 5. Localize the ORFs of the putative causal loci with the strongest effects by computing  
922 confidence intervals for each phenotype.

923 In Step 1, we apply a greedy algorithm to pre-filter the loci. We order the SNPs (loci) by  
924 genomic position. We select the first SNP. We subsequently select the next SNP that has  
925 genotypic (Pearson) correlation  $< 0.94$  with the most recently selected SNP. This process is  
926 repeated until we get to the last SNP.

927 Steps 2 and 4 use the implementation of  $\ell_{2,1}$ -based regression from the *glmnet* R library  
928 [39]. The regularization parameter  $\lambda_F$  in Eq. (3) is set using cross-validation. Specifically,

929 the training, validation, and test sets are obtained by splitting the columns of  $\mathbf{X}$  (corre-  
930 sponding to segregants) in the ratio 80:10:10, *glmnet* solves Eq. 3 on the training set for  
931 a range of  $\lambda_F$ , and we select the solution with the minimum mean absolute error on the  
932 validation set. We use the test set to evaluation our predictions before and after matrix  
933 decomposition, see Figure S7a.

934 The goals of Step 3 are to more accurately localize the putative causal loci returned by  
935 Step 2 and to determine whether some putative causal loci are summarizing the effects of  
936 multiple nearby loci with distinct effects. The putative causal loci identified by *glmnet* in  
937 Step 2 are a subset of the loci chosen via the greedy prefiltering done in Step 1. Therefore, it  
938 is quite possible that the true causal locus was filtered out in Step 1, and the putative causal  
939 locus identified by *glmnet* is a nearby locus that is highly correlated with the true casual  
940 locus. Alternatively, a putative causal locus identified by *glmnet* may describe the effect of  
941 one nearby causal locus for certain phenotypes and a different nearby causal locus for other  
942 phenotypes, i.e. the putative causal locus is summarizing multiple loci with different effects.

943 To arrive at a new list of loci that we believe to more likely to be causal, we replace each  
944 locus identified in Step 2 with a set of loci constructed according to the following procedure.  
945 For each locus  $\ell$ , we first apply the method described in Section 7a to compute a confidence  
946 interval of locations for the true causal locus for each phenotype separately. For each locus  
947  $z$  in the confidence interval for phenotype  $e$ , we also return best approximation of the linear  
948 effect of locus  $z$  on phenotype  $e$ , which we denote  $\hat{f}_z^e$  (computed as described above Eq. 7).  
949 Across loci in a confidence interval, a higher value of  $|\hat{f}_z^e|$  indicates that locus  $z$  is more likely  
950 to be causal.

951 We iteratively select loci for the new set as follows. For each locus  $z$  in some confidence  
952 interval, we compute  $v(z) = \sum_e |\hat{f}_z^e|$  where  $\hat{f}_z^e$  is set to zero when locus  $z$  is not in the  
953 confidence interval for phenotype  $e$ . The locus  $z^*$  that maximizes  $v$  is added to the new  
954 set. If locus  $z^*$  is in the confidence interval for all phenotypes, we add no other loci to the  
955 new set. Effectively, we have replaced  $\ell$  with a nearby locus  $z^*$  that is in the confidence  
956 interval for each phenotype and exhibits a stronger effect (measured by the magnitude of  
957 effect size summed across environments). If there are phenotypes whose confidence intervals  
958 do not contain  $z^*$ , it is likely the case that locus  $\ell$  summarizes the effects of different causal  
959 loci for different phenotypes. We need to include more loci in the new set so that the new  
960 set includes a least one locus in the confidence interval of each phenotype. To do so, we

961 remove all phenotypes whose confidence intervals contain  $z^*$  and again find the locus  $z^{**}$  that  
962 maximizes  $v$  (where now the summation in  $v$  is over a restricted set of phenotypes whose  
963 confidence intervals do not contain  $z^*$ ). We repeat this process until the each confidence  
964 interval contains at least one locus in the new set.

965 In Step 5 we localize the putative causal loci returned by *glmnet* in Step 4 to ORFs.  
966 Pinpointing the location is only possible for the strongest effect loci, so we restrict our  
967 analysis to loci that exhibit an additive effect of magnitude at least 0.003 for some phenotype.  
968 For each such locus  $\ell$  and phenotype  $e$ , we again use the method described in Section 7 a to  
969 compute a confidence interval and the best approximations of the linear effects  $\hat{f}_z^e$  for each  
970 locus  $z$  in the confidence interval. For each locus  $z$  in some confidence interval, we again  
971 compute  $v(z) = \sum_e |\hat{f}_z^e|$  where  $\hat{f}_z^e$  is set to zero when locus  $z$  is not in the confidence interval  
972 for phenotype  $e$ . We declare the locus  $z^*$  that maximizes  $v$  the “top” locus. We consider the  
973 intersection of all confidence intervals containing  $z^*$  to be the common confidence interval  
974 for locus  $\ell$ . We label locus  $\ell$  with the names of all ORFs corresponding to a locus in this  
975 common confidence interval.

#### 976 a. Confidence interval computation

977 We describe a method to identify a confidence interval for a single locus with respect to  
978 a single phenotype. We assume a linear model for the effect of a locus on the phenotype of  
979 segregant  $n$

$$R_n = f_t X_{tn} + \varepsilon_n, \quad (4)$$

where  $R_n$  is the “residual”, i.e., the phenotype measurement not explained by the rest of the loci,  $t$  is the index of the true locus,  $f_t$  is its true fitness effect, and  $\varepsilon_n \sim \mathcal{N}(0, \sigma^2)$  is a noise term which is drawn i.i.d from a normal distribution with mean zero and variance  $\sigma^2$ . To measure how well a nearby locus  $z$  explains the residuals, we compute the squared error between the observed residuals and the best approximation of the residuals as a linear function of  $X_{z,:}$ , which we call  $\hat{f}_z$ . We define this error as

$$\mathcal{C}(z) = \frac{1}{N} \sum_{n=1}^N (R_n - \hat{f}_z X_{zn})^2. \quad (5)$$

To arrive at a confidence interval, we suppose that  $\ell$  is the locus that minimizes  $\mathcal{C}$  when  $t$  is the true causal locus and compute the probability that  $\ell$  minimizes  $\mathcal{C}$  under this assumption:

$$P(\mathcal{C}(\ell) < \mathcal{C}(t) | t \text{ is the true causal locus}). \quad (6)$$

980 If this probability is less than 0.023 (two standard deviations), we reject the hypothesis that  
981  $t$  is the true causal loci and exclude  $t$  from the confidence interval.

Now we explain how to compute (6). Let  $\hat{\mathbf{F}}$  and  $\hat{\mathbf{c}}$  be the putative additive effects matrix and linear term returned by  $\ell_{2,1}$  optimization, and let  $\ell$  and  $e$  be the locus and phenotype of interest respectively. Since we consider one phenotype at a time, we suppress the dependency on  $e$  and write  $\mathbf{Y} = \mathbf{Y}_{e,:}$  and  $c = \mathbf{c}_e$ . By a slight abuse of notation, when  $\ell$  appears as a subscript of  $\hat{\mathbf{F}}$  it refers to the column corresponding to the locus  $\ell$  and when  $\ell$  appears as a subscript of  $\mathbf{X}$  it refers to the row corresponding to the locus  $\ell$  (these will not necessarily have the same index). Throughout, we use bar to denote averages over the  $N$  segregants. We use the putative additive effects map to compute the residuals,

$$\mathbf{R}_n = (\mathbf{Y}_n - c) - \sum_{i \neq \ell} \hat{\mathbf{F}}_{ei} \mathbf{X}_{in}.$$

982 For a locus  $z$ , the best approximation of the residuals as a linear function of  $\mathbf{X}_{z,:}$ , i.e. the  
983 value of  $\hat{f}_z$  that minimizes  $\mathcal{C}(z)$ , is  $\hat{f}_z = \overline{\mathbf{R}\mathbf{X}_z} / \overline{\mathbf{X}_z^2}$ . Plugging this expression into Eq. 5, we  
984 have  $\mathcal{C}(\ell) = \overline{\mathbf{R}^2} - \hat{f}_\ell^2 \overline{\mathbf{X}_\ell^2}$  and  $\mathcal{C}(t) = \overline{\mathbf{R}^2} - \hat{f}_t^2 \overline{\mathbf{X}_t^2}$ . Taking the difference, we obtain

$$\mathcal{C}(\ell) - \mathcal{C}(t) = \hat{f}_t^2 \overline{\mathbf{X}_t^2} - \hat{f}_\ell^2 \overline{\mathbf{X}_\ell^2}. \quad (7)$$

985 Since  $\mathbf{R}_n = f_t \mathbf{X}_{tn} + \varepsilon_n$ , it follows that

$$\hat{f}_\ell = \frac{\overline{(f_t \mathbf{X}_t + \varepsilon) \mathbf{X}_\ell}}{\overline{\mathbf{X}_\ell^2}} = \frac{f_t \overline{\mathbf{X}_t \mathbf{X}_\ell} + \overline{\varepsilon \mathbf{X}_\ell}}{\overline{\mathbf{X}_\ell^2}} = f_t \rho_{t\ell} + \gamma_\ell, \quad (8)$$

986 where  $\rho_{t\ell} = \overline{\mathbf{X}_t \mathbf{X}_\ell} / \overline{\mathbf{X}_t^2}$  is the fraction of segregants with genotype +1 at  $t$  that also have  
987 genotype +1 at  $\ell$ , and  $\gamma_\ell = \overline{\varepsilon \mathbf{X}_\ell} / \overline{\mathbf{X}_\ell^2}$  is a random variable equal to the average noise over all



988 segregants with genotype +1 at  $\ell$ . Similarly,

$$\hat{f}_t = \frac{\overline{(f_t \mathbf{X}_t + \varepsilon) \mathbf{X}_t}}{\overline{\mathbf{X}_t^2}} = \frac{f_t \overline{\mathbf{X}_t^2} + \overline{\varepsilon \mathbf{X}_t}}{\overline{\mathbf{X}_t^2}} = f_t + \gamma_t, \quad (9)$$

where  $\gamma_t = \overline{\varepsilon \mathbf{X}_t} / \overline{\mathbf{X}_t^2}$  is a random variable equal to the average noise over all segregants with genotype +1 at  $t$ . Plugging these into Eq. (7), we obtain

$$\mathcal{C}(\ell) - \mathcal{C}(t) = \left( \overline{\mathbf{X}_t^2} (f_t + \gamma_t)^2 - \overline{\mathbf{X}_\ell^2} (f_t \rho_{t\ell} + \gamma_\ell)^2 \right) \quad (10)$$

$$\approx \left( (f_t + \gamma_t)^2 - (f_t \rho_{t\ell} + \gamma_\ell)^2 \right) \overline{\mathbf{X}_t^2} \quad (11)$$

989 Assuming that  $\ell$  and  $t$  are nearby, linkage guarantees that most segregants will have the  
 990 same genotype at these positions. As a result,  $\overline{\mathbf{X}_t^2} \approx \overline{\mathbf{X}_\ell^2}$  (validating approximation (11))  
 991 and  $\rho_{t\ell}$  will be close to one. Since  $\gamma_t, \gamma_\ell$  are order  $1/\sqrt{N}$  (as they are the mean of order  $N$   
 992 normals with constant variance  $\sigma^2$ ), they tend to be much smaller than  $f_t$  whenever  $f_t$  is  
 993 significant enough to be causal. We therefore may assume that  $f_t$  and  $f_t + \gamma_t$ , and  $f_t \rho_{t\ell} + \gamma_\ell$   
 994 have the same sign.

Suppose  $f_t > 0$ . Then  $\mathcal{C}(\ell) < \mathcal{C}(t)$  whenever  $f_t(1 - \rho_{t\ell}) < \gamma_t - \gamma_\ell$ . Let  $\Gamma$  be the random variable equal to  $\gamma_t - \gamma_\ell$ . Again using the approximation that  $\overline{\mathbf{X}_t^2} \approx \overline{\mathbf{X}_\ell^2}$ ,  $\Gamma \approx \overline{\varepsilon(\mathbf{X}_t - \mathbf{X}_\ell)} / \overline{\mathbf{X}_t^2}$  is  $1/(N\overline{\mathbf{X}_t^2})$  times the difference between the noise summed over all segregants with genotype +1 at  $t$  and 0 at  $\ell$  and the noise summed over all segregants with genotype 0 at  $t$  and +1 at  $\ell$ . (Note  $\Gamma$  is not affected by the noise from segregants that have the same genotype value at  $t$  and  $\ell$ .) Thus, we can approximate  $\Gamma$  as  $1/(N\overline{\mathbf{X}_t^2})$  times the sum of  $d$  i.i.d. draws of  $\mathcal{N}(0, \sigma^2)$  where  $d = (1 - \rho_{t\ell})\overline{\mathbf{X}_t^2}N + (1 - \rho_{\ell t})\overline{\mathbf{X}_\ell^2}N$  is the number of segregants with a recombination breakpoint between  $t$  and  $\ell$ . The assumption that  $\overline{\mathbf{X}_t^2} \approx \overline{\mathbf{X}_\ell^2}$  implies  $\rho_{t\ell} \approx \rho_{\ell t}$  and  $d \approx 2(1 - \rho_{t\ell})\overline{\mathbf{X}_t^2}N$ . We approximate  $\Gamma \sim \mathcal{N}\left(0, 2(1 - \rho_{t\ell})\sigma^2/(N\overline{\mathbf{X}_t^2})\right)$ . It follows that

$$P(\mathcal{C}(\ell) < \mathcal{C}(t) | t \text{ is the true causal locus}) \approx P(\Gamma > f_t(1 - \rho_{t\ell})). \quad (12)$$

The probability of this event is less than 2.3% whenever the value  $f_t(1 - \rho_{t\ell})$  is at least 2 standard deviations of  $\Gamma$ . Thus, we reject the null hypothesis that  $t$  is the true causal locus

whenever

$$1 - \rho_{t\ell} \geq \frac{8\sigma^2}{N\bar{\mathbf{X}}_t^2 f_t^2}. \quad (13)$$

995 Note we are most likely to reject the null hypothesis when  $f_t$  is high (the true locus has a  
 996 large effect) and  $\rho_{t\ell}$  is small (a high fraction segregants have a breakpoint between  $t$  and  $\ell$ ).  
 997 In other words, it is easiest to identify the causal locus when its effect size is large and there  
 998 are many segregants with breakpoints nearby.

999 In practice, to verify (13) we approximate  $f_t \approx \hat{f}_\ell = \overline{R\mathbf{X}_\ell}/\overline{\mathbf{X}_\ell^2}$  and  $\sigma^2$  as the cost  $\mathcal{C}(\ell)$ .  
 1000 First, as derived in (8), the estimated effect size  $\hat{f}_\ell$  will differ from the true effect size  $f_t$   
 1001 by  $\hat{f}_\ell - f_t = \gamma_\ell + f_t(\rho_{t\ell} - 1)$ . The relative error of the former approximation is  $|\hat{f}_\ell -$   
 1002  $f_t|/|f_t| = |\gamma_\ell/f_t + (\rho_{t\ell} - 1)|$ , which is small since  $|\gamma_\ell| \ll |f_t|$  and  $1 - \rho_{t\ell} \ll 1$ . Second,  
 1003 we have  $\mathcal{C}(\ell) = \overline{\mathbf{R}^2} - \hat{f}_\ell^2 \overline{\mathbf{X}_\ell^2} = \overline{(f_t \mathbf{X}_t + \varepsilon)^2} - \hat{f}_\ell^2 \overline{\mathbf{X}_\ell^2}$ . Expanding this expression and using  
 1004  $\overline{\varepsilon^2} \approx \sigma^2$ ,  $\overline{\mathbf{X}_\ell^2} \approx \overline{\mathbf{X}_t^2}$  gives  $\mathcal{C}(\ell) \approx (f_t^2 - \hat{f}_\ell^2) \overline{\mathbf{X}_t^2} + 2f_t \varepsilon \overline{\mathbf{X}_t} + \sigma^2$ . Note that  $\hat{f}_\ell = f_t \rho_{t\ell} + \gamma_\ell$  and  
 1005  $\varepsilon \overline{\mathbf{X}_t} = \gamma_t \overline{\mathbf{X}_t^2}$ . Thus,  $\mathcal{C}(\ell) \approx (f_t^2(1 - \rho_{t\ell}^2) - 2f_t \rho_{t\ell} \gamma_\ell - \gamma_\ell^2 + 2f_t \gamma_t) \overline{\mathbf{X}_t^2} + \sigma^2$ . Since  $1 - \rho_{t\ell}^2$  is small  
 1006 and  $\gamma_t, \gamma_\ell$  are both order  $1/\sqrt{N}$ ,  $\mathcal{C}(\ell)$  is a good estimator for  $\sigma^2$ .

#### 1007 *b. Comparison to other QTL mapping approaches*

1008 Existing approaches for mapping QTLs of multiple traits include composite interval map-  
 1009 ping [40], least squares regression [41], and Bayesian inference [42, 43]. See survey given in  
 1010 Chapters 14 and 15 of [44]. The scale of our dataset ( $\sim 42000$  loci,  $\sim 100,000$  individuals)  
 1011 renders such methods intractable. Instead, we turn to *glmnet*, a fast solver for regularized  
 1012 generalized linear models [39] that is capable of handling the scale of our data. In [45],  
 1013 Qian et. al. apply *glmnet* with a standard lasso penalty for QTL mapping of four traits  
 1014 separately using data from the UK biobank. We extend this approach by mapping QTLs  
 1015 for multiple traits simultaneously using *glmnet* with an  $\ell_{2,1}$  error. Moreover, the extreme  
 1016 linkage present in our dataset necessitates post-processing to identify confidence intervals  
 1017 for the casual loci.

(a) Locus rotation test with  $W$ -sparsity 1.0

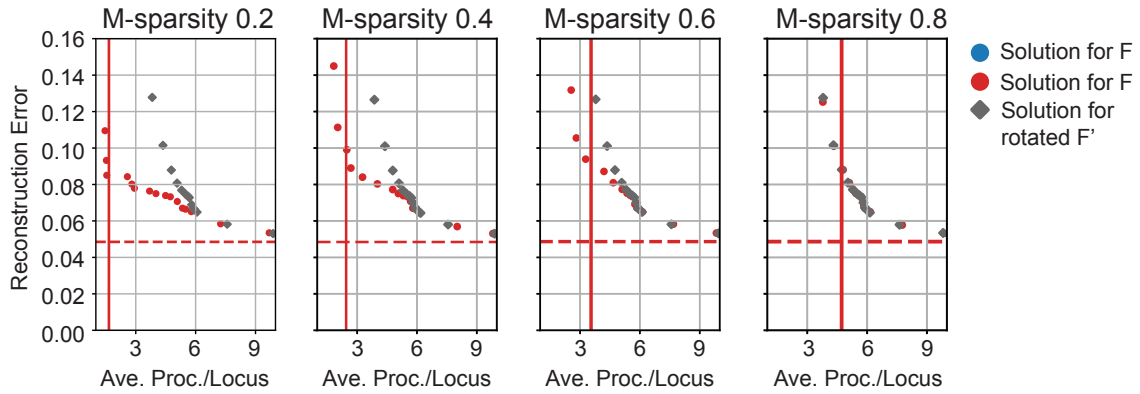

(b) Phenotype rotation test with  $M$ -sparsity 1.0

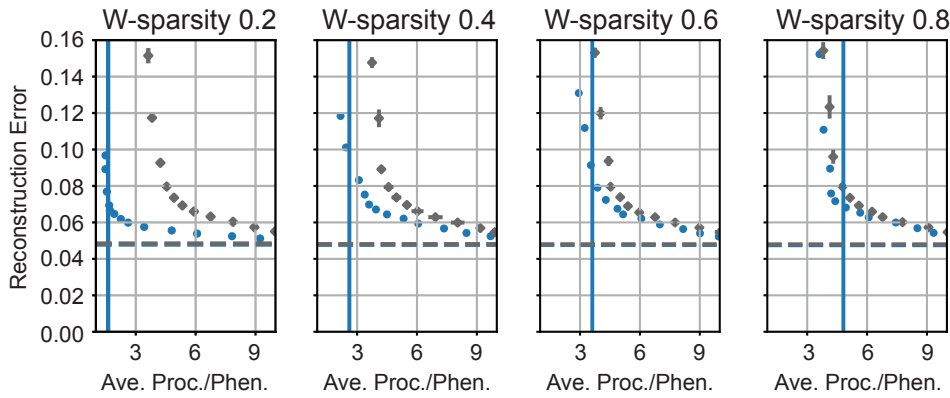

FIG. S1: **Rotation tests on synthetic data over a range of sparsities** (a) Analogous plots to the loci rotation test in Column 1 of Figure 2 for a synthetic additive effects matrix with a range of  $M$ -sparsities and  $W$ -sparsity equal to 1. (b) Analogous plots to the phenotype rotation test in Column 1 of Figure 2 for a synthetic additive effects matrix with a range of  $W$ -sparsities and  $M$ -sparsity equal to 1.

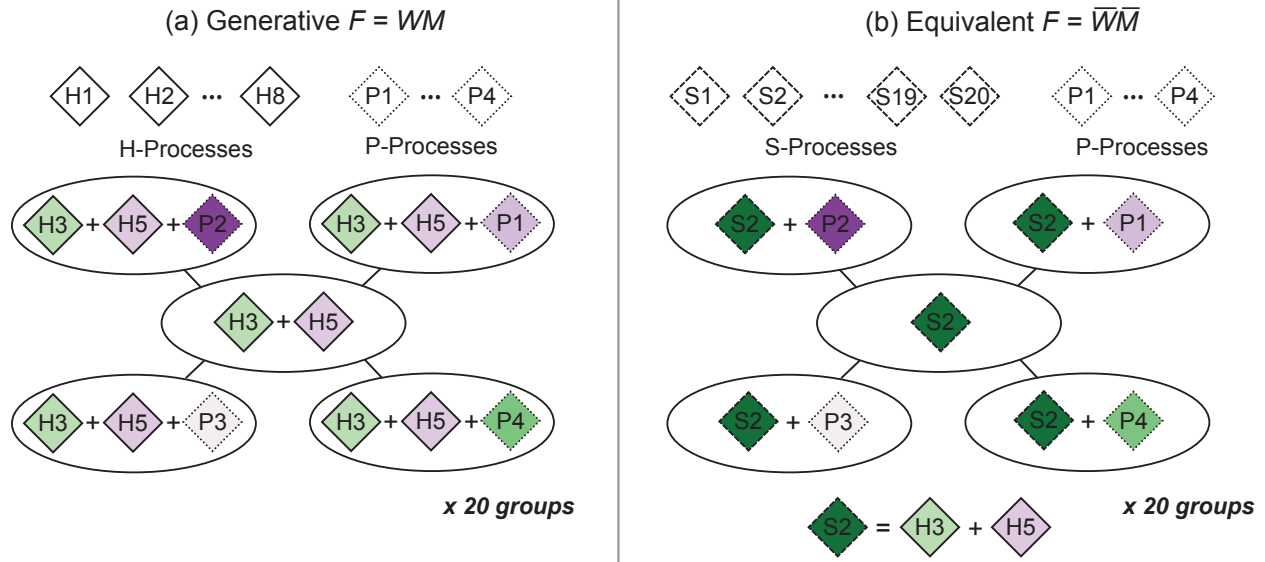

FIG. S2: **Generation of hub-and-spoke synthetic data.** Diamonds represent processes, ovals represent phenotypes, and the color of the process represents its weight in the phenotype. (a) The core phenotype (center hub) is the weighted sum of two hub processes (H-process), and each perturbation is the sum of the processes of the core phenotype plus a weighted perturbation process (P-process). The group of five phenotypes depicted here corresponds to the group of phenotypes labeled in Figure S3c. We generate 20 such groups from the common set of 8 hub and 4 perturbation process, as detailed in Methods 4. (b) An alternate way to generate the same  $\mathbf{F}$  matrix is to replace the  $H$ -process with one  $S$ -process per phenotype.

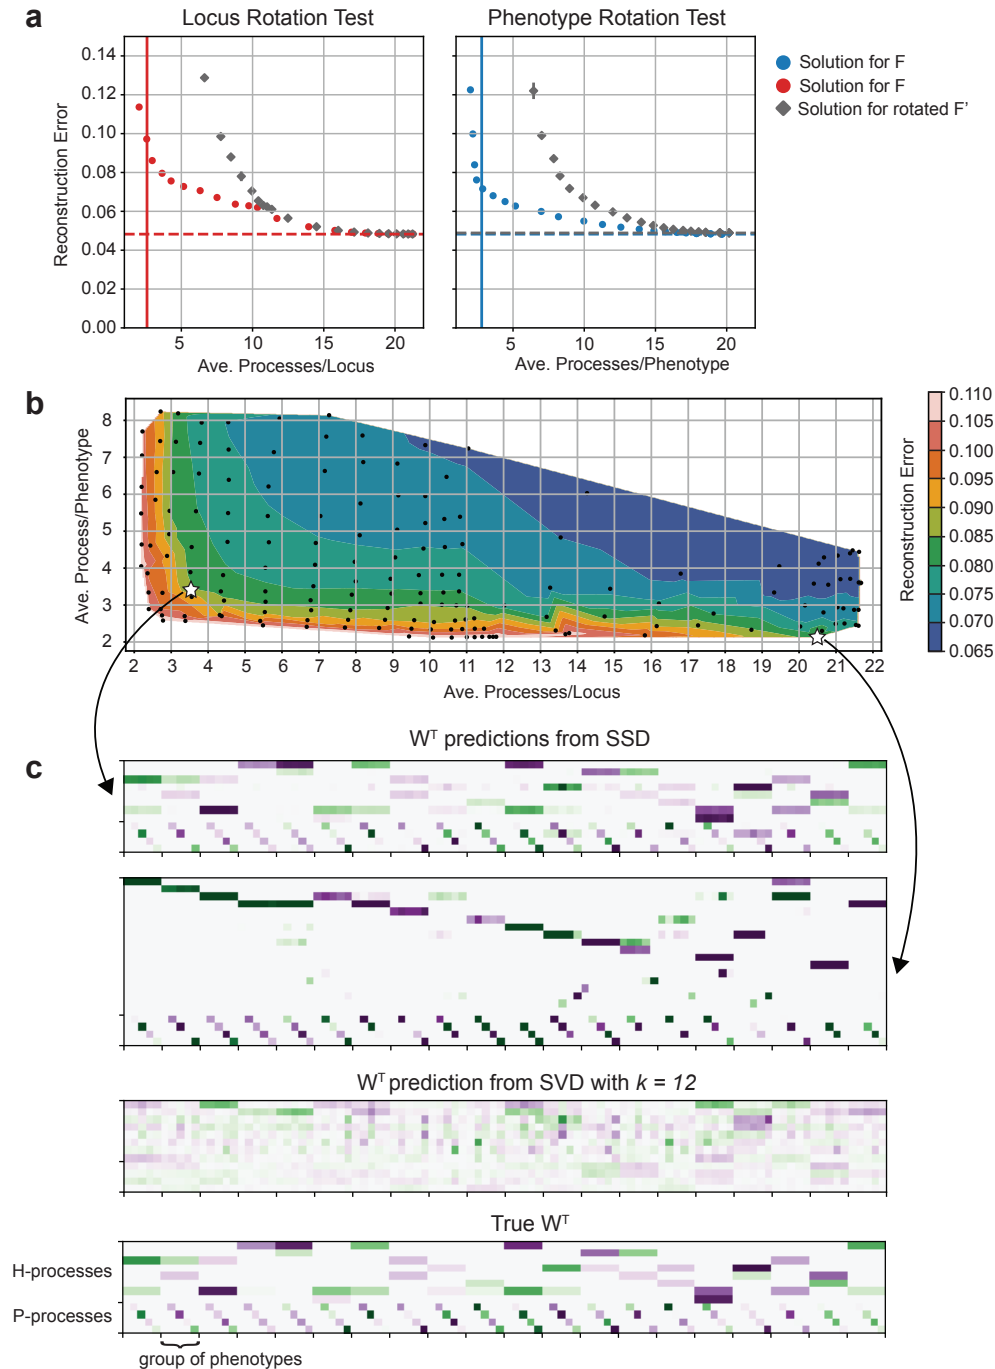

FIG. S3: **SSD on hub-and-spoke synthetic data.** (a) The rotation tests suggest both locus and phenotype sparsity. (b) Our SSD method finds a range of solutions at different sparsity and error levels. We consider two SSD solutions: one with 12 core processes and reconstruction error 0.086 that is sparse in both loci and phenotypes (lower left star) and one with 21 processes and reconstruction error 0.083 that is sparse in phenotype only (lower right star). (c) Illustrations of predicted and true  $W^T$ . The values are illustrated on a purple-to-green scale ranging from -10 times to +10 times the average magnitude of an entry in the  $W$  matrix. The five phenotypes labeled “group of phenotypes” are illustrated in Figure S2a. The matrix  $W$  for the 12 core process solution approximates the generative  $W$  well. The matrix  $W$  for the 21 core process solution has a structure similar to alternate generative structure  $\bar{W}$  described in Figure S2b.

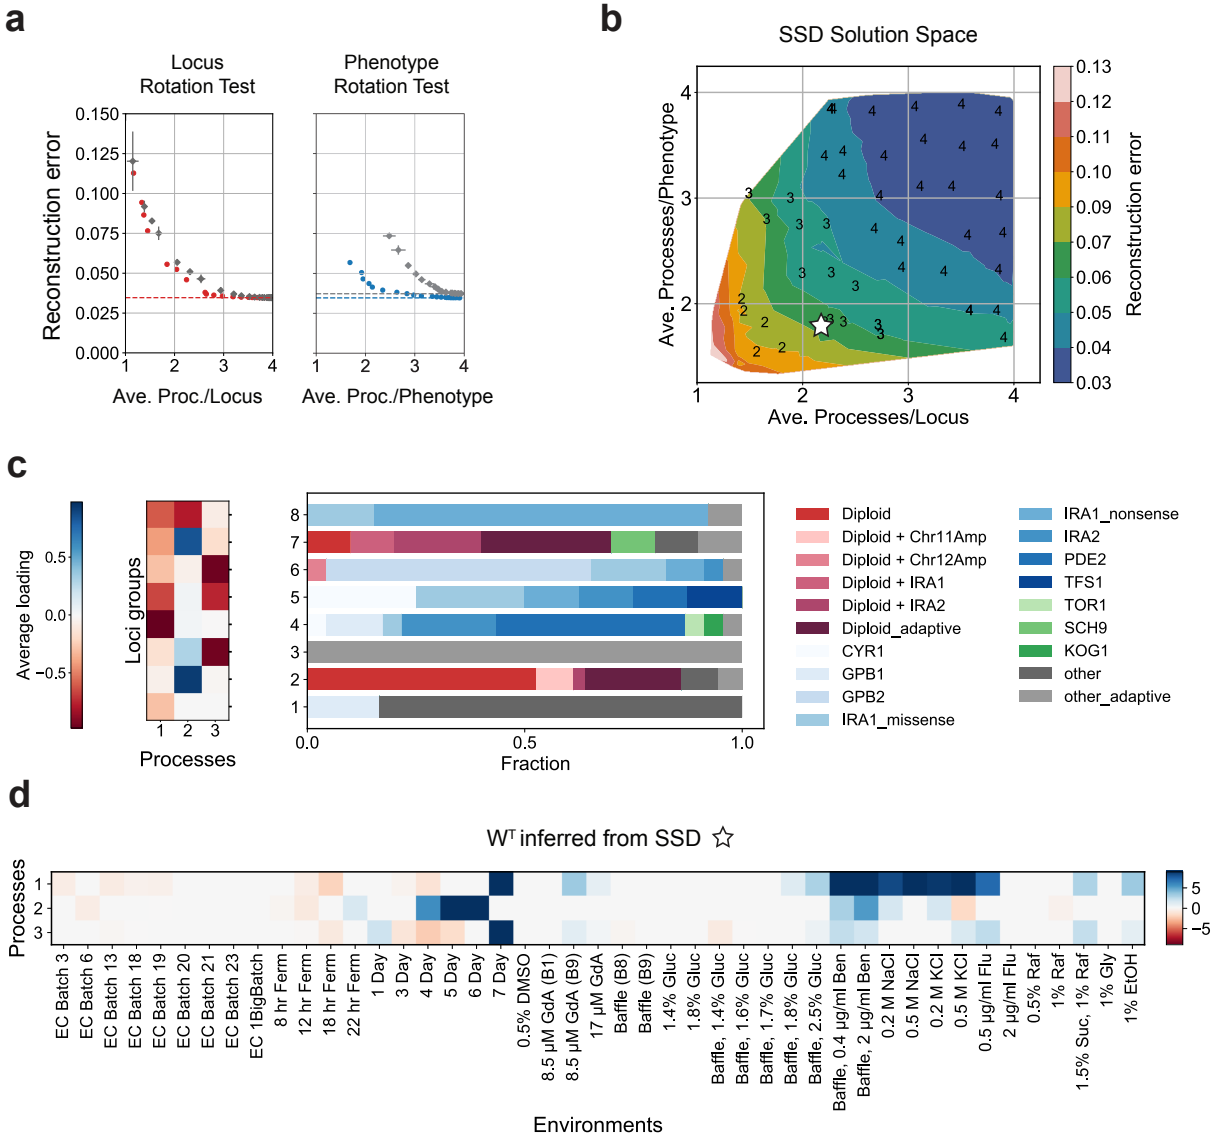

**FIG. S4: SSD applied to Kinsler et al. [15] data with fewer diploid mutants.** To ensure that the many diploids do not bias our results, we repeated the analysis presented in Figure 3 with a reduced effects matrix  $\mathbf{F}$ . Specifically, we randomly sampled 20 diploids of the 188 in the original dataset leading to an  $\mathbf{F}$  with dimensions  $45 \times 120$ . Despite much lower locus-sparsity, the examined  $\mathbf{M}$  and  $\mathbf{W}$  solutions show similar features as the ones obtained using the full  $\mathbf{F}$  (Figure 3). (a) The locus rotation test shows much reduced sparsity in the locus-process map compared to the dataset with diploids included (Figure 3b). The sparsity in the process-phenotype map is retained. (b) The solution space illustrating highly sparse solutions with low reconstruction error. The selected solution ( $K = 3$ ), which is chosen to match the reconstruction error of the solution picked in Figure 3, is marked with a white star. (c) The  $\mathbf{M}$  matrix with loci clustered into 8 groups based on linkage clustering of loci with a modified cosine similarity metric as in Figure 3d. (d) The process-phenotype map  $\mathbf{W}$ . Processes 1 and 2 from the full  $\mathbf{F}$  (Figure 3e) are comparable to processes 1 and 2 respectively, whereas process 3 here appears to capture processes 3 and 4 for the full  $\mathbf{F}$ .

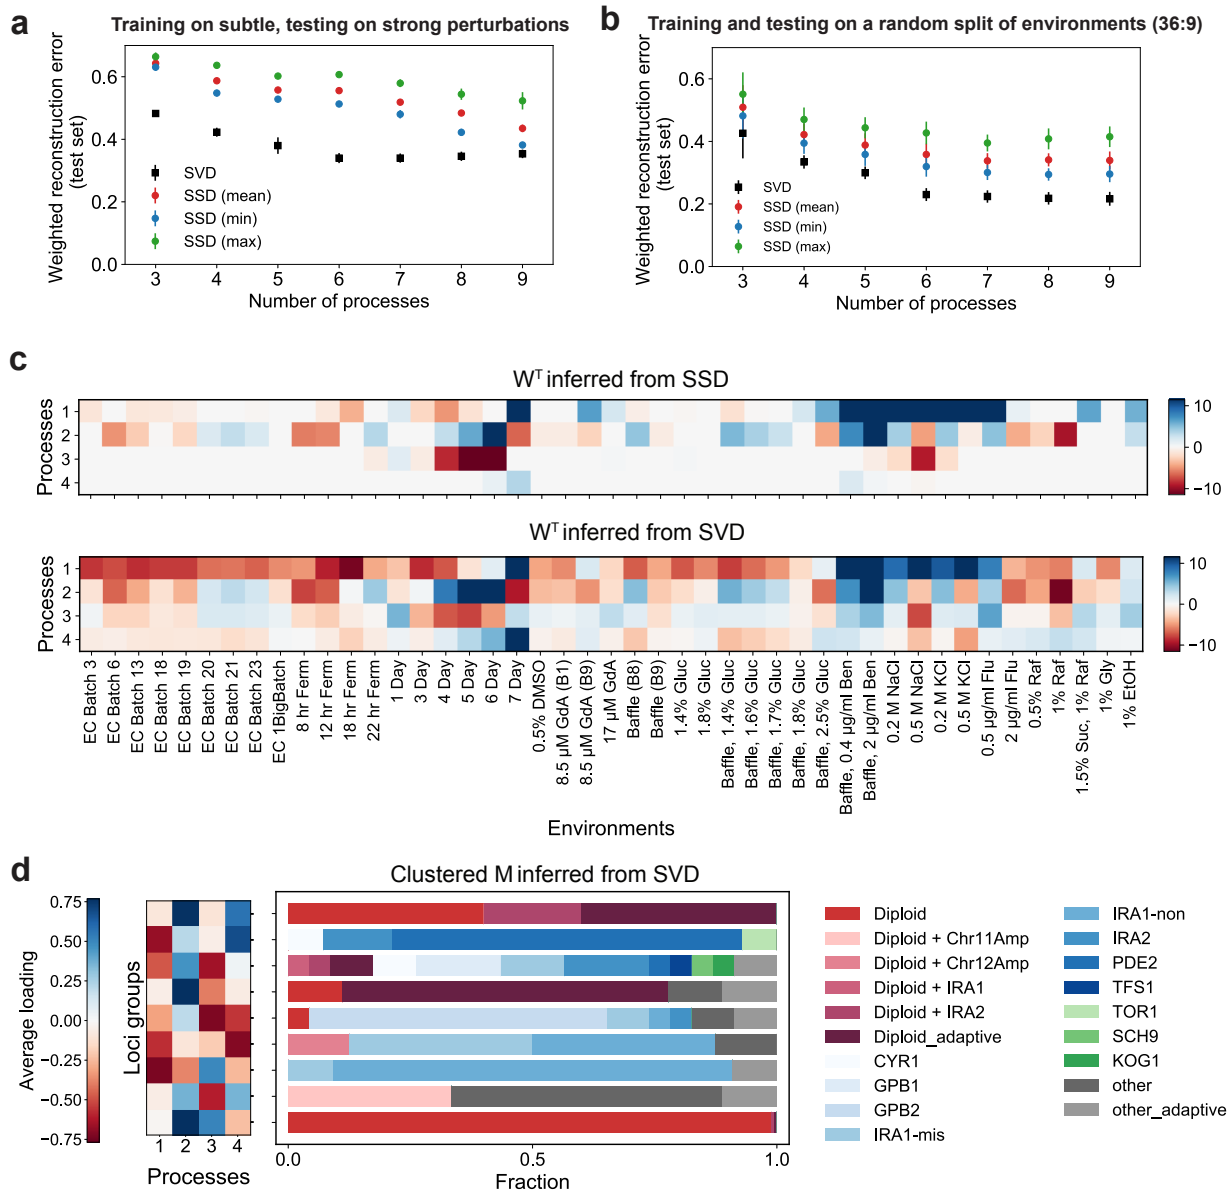

FIG. S5: Comparison of SSD and SVD decompositions on Kinsler et al. [15] data. (a,b) Bi-cross-validation on held-out sets as described in [38] and applied in [15]. See Section 5 for more details. The results are averaged over 8 random seeds. For SSD, we present the minimum, maximum and mean weighted reconstruction errors across all the hyper-parameters  $\lambda_W, \lambda_M$  described in the Methods for a given number of processes  $K$ . SVD of the same rank tends to show lower generalization error compared to SSD. (c) The process-phenotype map  $W$  from SSD and SVD, highlighting that the SSD solution is much sparser. The SSD solution is reproduced from Figure 3e. Since SVD does not fit **b** separately, here we estimate **b** as the mean effect across environments for each locus and subtract it from **F** before applying SVD. (In Kinsler et al., they do not subtract the means, and so their first SVD component approximately represents the constant effect **b**.) (d) Hierarchical/agglomerative clustering of  $M$  inferred from SVD similar to Figure 3d (see Methods for clustering parameters). Note the denser loading matrix as compared to the analogous figure for the SSD solution (Figure 3d).

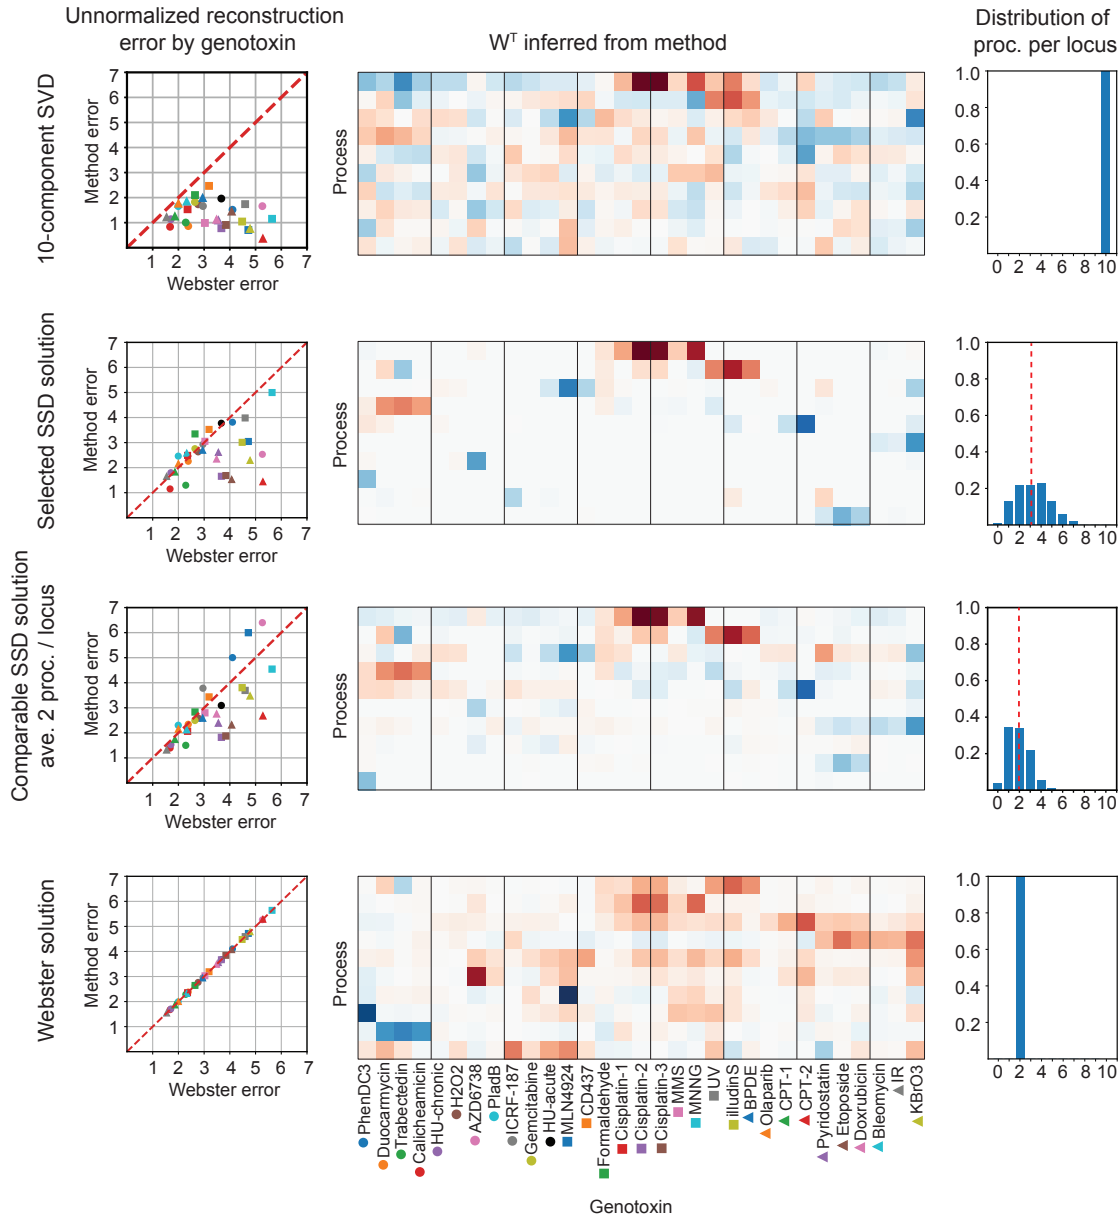

FIG. S6: Comparison of SVD, SSD, and Webster decompositions on genotoxin data. Each row corresponds to a decomposition found by SVD, SSD, or Webster, as labeled on the left. The leftmost column compares the unnormalized reconstruction error for each method as compared to Webster for each genotoxin separately. The center column illustrates the process-genotoxin map found by each method; the SSD solutions exhibit the most sparsity. The rightmost column illustrates the distribution of processes per locus in each decomposition. The red dotted line depicts the mean.



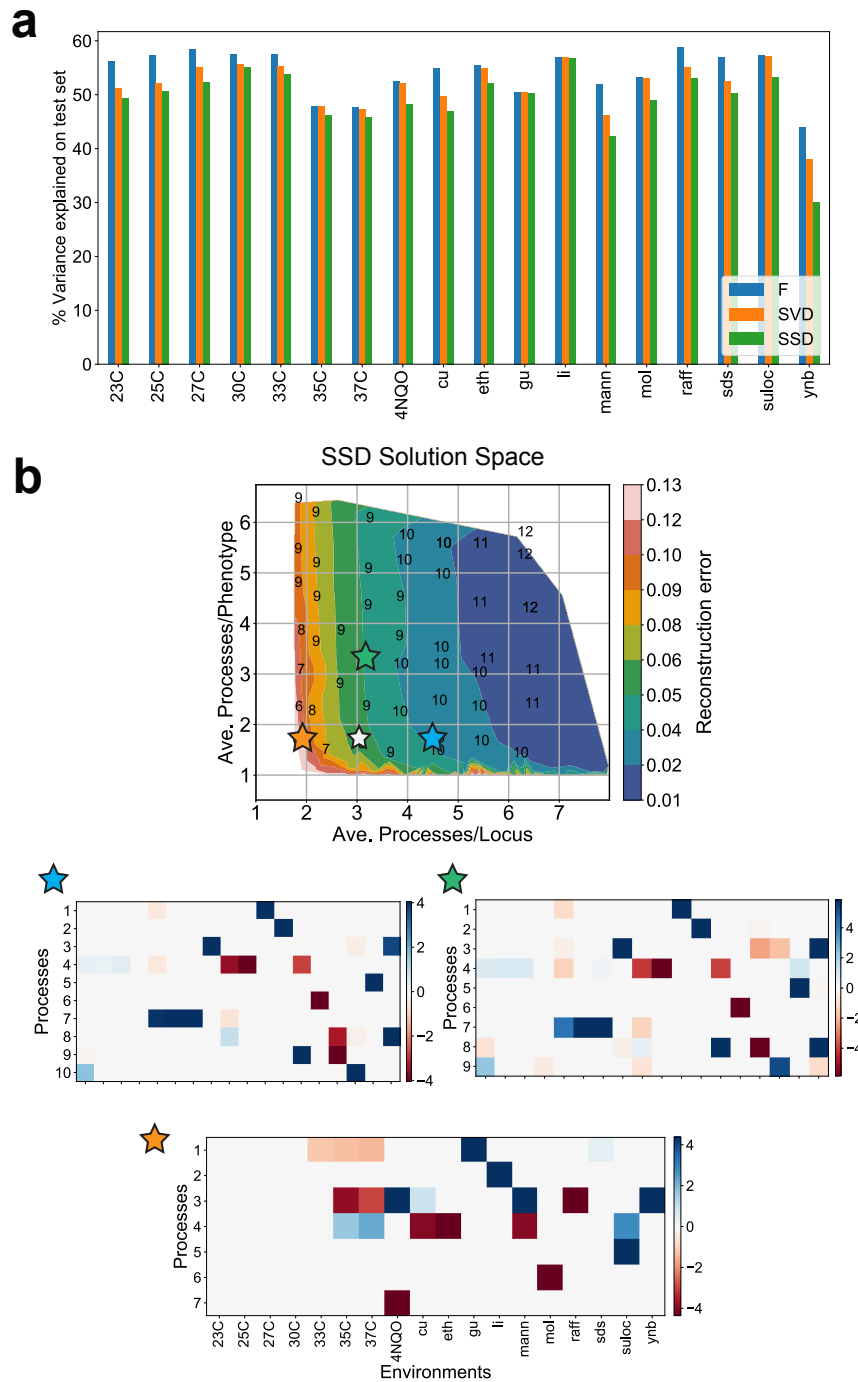

FIG. S7: Variance explained on the test set and the process-phenotype map of other SSD solutions for the yeast cross data. (a) The percentage variance explained when predicting the fitness in individual environments on a test set of genotypes (i.e., as  $\mathbf{Y}_{\text{test}} = \hat{\mathbf{F}}\mathbf{X}_{\text{test}} + \mathbf{c}$ ), shown here when  $\hat{\mathbf{F}}$  is the full additive effects matrix  $\mathbf{F}$  (blue), the 8-component SVD approximation of  $\mathbf{F}$  (orange) and the 8-component SSD solution analyzed in the main text and marked in Figure 5d (green). (b) The process-phenotype map  $\mathbf{W}$  for three additional solutions marked in the solution space. The white star marks the SSD solution discussed in the main text. Note that the general features are conserved between the solutions marked with the blue and green stars. The much sparser solution marked by the orange star also devotes dedicated processes for li, gu and mol, but tends to group the other processes together.
